# Supplementary material for: Octahedral iron(iv)–tosylimido complexes exhibiting single electron-oxidation reactivity
Source: PubMed Central journal article supplement — Chem Sci. 2019 Aug 20;10(41):9513–29. doi: 10.1039/c9sc02526j (PMC6979323; doi:10.1039/c9sc02526j), 2019-08-20
Supplement: SC-010-C9SC02526J-s001.pdf [file SC-010-C9SC02526J-s001.pdf]

### Supporting Information for

#### Octahedral Iron (IV) Tosylimido Complexes Exhibiting Single Electron Oxidation Reactivity

Gerard Sabenya,<sup>a</sup> Ilaria Gamba,<sup>a</sup> Laura Gómez,<sup>a</sup> Martin Clémancey,<sup>b</sup> Jonathan R Frisch,<sup>c</sup> Eric J. Klinker,<sup>c</sup> Geneviève Blondin,<sup>b</sup> Stéphane Torelli,<sup>b</sup> Lawrence Que, Jr,<sup>c,\*</sup> Vlad Martin-Diaconescu,<sup>a,d\*</sup> Jean-Marc Latour,<sup>b,\*</sup> Julio Lloret-Fillol,<sup>a,d,e\*</sup> Miquel Costas.<sup>a,\*</sup>

- a) Institut de Química Computacional i Catàlisi (IQCC) and Departament de Química, Universitat de Girona. Campus Montilivi, E17071 Girona, Catalonia (Spain)  
[miquel.costas@udg.edu](mailto:miquel.costas@udg.edu)
- b) Univ. Grenoble-Alpes, CNRS, CEA, IRIG, DIESE, CBM, Grenoble 38000, France
- c) Department of Chemistry, University of Minnesota, Pleasant Str 207, Minneapolis, Minnesota
- d) Institute of Chemical Research of Catalonia (ICIQ), The Barcelona Institute of Science and Technology, Avinguda Països Catalans 16, 43007 Tarragona, Spain. [jlloret@iciq.es](mailto:jlloret@iciq.es).
- e) Catalan Institution for Research and Advanced Studies (ICREA), Passeig Lluís Companys, 23, 08010, Barcelona (Spain).

## Index

|                                      |     |
|--------------------------------------|-----|
| 1. Experimental section              | S3  |
| 2. Synthesis of complexes            | S4  |
| 3. Reactivity studies                | S5  |
| 4. Characterization and kinetic data | S8  |
| 5. Computational details             | S20 |
| 6. Cartesian Coordinates             | S25 |
| 7. References                        | S34 |

## 1. Experimental Section

Materials. Reagents were purchased from commercial sources and used as received, without any further purification. Compounds methyl *p* – tolyl sulfide, 4 – chlorothioanisole and formaldehyde were purchased from Fluorochem, Alfa Aesar and Scharlab respectively, while the rest of the compounds were purchased from Sigma – Aldrich. Solvents were purchased from SDS and Scharlab, purified and dried by passing through an activated alumina purification system (MBraun SPS – 800) and stored in an anaerobic glovebox under N<sub>2</sub>.

**Physical Methods.** UV – VIS – NIR spectra were recorded on a Cary 50 diode array spectrophotometer (190 – 1100 nm range) in 1 cm quartz cells. A cryostat from Unisoku Scientific Instruments was used for the temperature control. Electrospray ionization mass spectrometry (ESI – MS) experiments were performed on a Bruker Daltonics Esquire 3000 Spectrometer or on a high – resolution mass spectrometer Bruker microTOF QII (Q – TOF) with a quadrupole analyser. <sup>1</sup>H and <sup>13</sup>C NMR spectra were recorded on a Bruker Avance 400 MHz spectrometer as solutions at 25°C and referenced to residual solvent peaks. The Mössbauer samples consisted of frozen <sup>57</sup>Fe-enriched solutions contained in Delrin cups. Mössbauer spectra were recorded at 5 K on a low-field Mössbauer spectrometer equipped with a Janis CCR 5 K cryostat or at 4.2 K on a strong-field Mössbauer spectrometer equipped with an Oxford Instruments Spectromag 4000 cryostat containing an 8 T split-pair superconducting magnet. Both spectrometers were operated in a constant acceleration mode in transmission geometry. The isomer shifts were referenced against that of a room-temperature metallic iron foil. Analysis of the data was performed with the software WMOSS Mössbauer Spectral Analysis Software (<http://www.wmoss.org>), 2012-2013 (Web research, Edina).

X-band EPR spectra were recorded on a Bruker EMX spectrometer equipped with an Oxford ESR 910 cryostat for low temperature studies. The microwave frequency was calibrated with a frequency counter and the magnetic field with an NMR gaussmeter. The modulation amplitude employed was selected to optimize the signal-to-noise (S/N) ratio and resolution under conditions of nonsaturating microwave power.

**XAS data collection and processing:** Samples for X – ray absorption measurements were prepared as 4 mM solutions in acetone loaded in sample holders and stored at liquid nitrogen temperatures until run. XAS data on compounds **1<sup>(IV)</sup>=NTs**, **1<sup>(III)</sup> – NHTs**, and **2<sup>(III)</sup> – NHTs** was collected at the ESRF synchrotron, Spline beamline, under anaerobic conditions at 90 K using a liquid nitrogen cryostat a 13 element detector and a Si(111) double crystal monochromator.. Compound **2<sup>(IV)</sup>=NTs**, on the other hand was run at 25 K using a liquid helium cryostat from the SAMBA beamline at SOLEIL synchrotron, equipped with a Si (220) double crystal monochromator and a 35 – element Ge detector.

Data processing was carried out with the Athena software package.<sup>1</sup> A linear pre – edge together with a quadratic post – edge function were used for baseline subtraction and normalization of the edge jump to 1. Energy calibration was carried out using the first inflection point of Fe foil set as 7111.2 eV. The AUTOBK algorithm was used to extract EXAFS with E0 set as the first inflection point of the rising edge, together with an  $R_{\text{bkg}}$  of 1 and a spline with a  $k$  – range of 1 to 14.5 Å<sup>-1</sup>. EXAFS analysis was carried out with Artemis, employing the Iffefit engine and FEFF6 code.<sup>2, 3</sup> The  $k^2$  – weighted data was fit in  $R$  – space was fit in  $R$  – space between 1 and 3 Å, with a  $k$  – range of 2 – 12.5 Å, and a Hanning window with a  $dk$  of 2. Fits were carried out with a global  $S_0^2$  of 0.9 as well as a global  $\Delta E_0$ . Scattering paths were fit in terms of  $\Delta R_{\text{eff}}$  and  $\sigma^2$ , and the goodness of fit was the  $R_{\text{factor}}$  (%R) and reduced  $\chi^2$  ( $\chi^2_{\text{v}}$ ) were minimized as previously described.<sup>4, 5</sup>

## 2. Synthesis of complexes

Synthesis of  $[\text{Fe}^{\text{II}}(\text{CH}_3\text{CN})(\text{MePy}_2\text{tacn})](\text{X})_2$  ( $\text{X} = \text{OTf}$  or  $\text{SbF}_6$ , **1<sup>(III)</sup>-OTf** or **1<sup>(III)</sup>-SbF<sub>6</sub>**) and  $[\text{Fe}^{\text{II}}(\text{CH}_3\text{CN})(\text{Me}_2(\text{CHPy}_2)\text{tacn})](\text{X})_2$  ( $\text{X} = \text{OTf}$  or  $\text{SbF}_6$ , **2<sup>(III)</sup>-OTf** or **2<sup>(III)</sup>-SbF<sub>6</sub>**) were performed as previously described.<sup>6, 7</sup>

Preparation of  $[\text{Fe}^{\text{IV}}(\text{NTs})(\text{MePy}_2\text{tacn})]^{2+}$  (**1<sup>(IV)</sup>=NTs**) with PhINTs. In an anaerobic glovebox, **1<sup>(III)</sup>** (1.8 mg,  $2.5 \cdot 10^{-3}$  mmol) and PhINTs (1.12 mg,  $3 \cdot 10^{-3}$  mmol) were mixed in  $\text{CH}_3\text{CN}$  (1 mL). The resulting solution was vigorously stirred 1 – 2 minutes. Removal of unreacted PhINTs was achieved by filtration, which afforded a golden solution of compound **1<sup>(IV)</sup>=NTs**. The yield of the reaction was estimated according to the amount of  $\text{Fe}^{\text{IV}}$  determined by Mössbauer spectroscopy by preparation of <sup>57</sup>Fe enriched sample of compound **1<sup>(IV)</sup>=NTs**. Yield: 87 %. <sup>1</sup>H – NMR ( $\text{CD}_3\text{CN}$ , 400 MHz, 300 K)  $\delta$ , ppm: 41.04 (s,  $\text{PyH}_{\beta\text{a}}$ ), 12.67 (s,  $\text{PyH}_{\gamma\text{a}}$ ), -13.31 (s,  $\text{PyH}_{\beta'\text{a}}$ ), 6.02 (s, 1H,  $\text{PyH}_{\gamma\text{b}}$ ), -5.58 (s, 1H,  $\text{PyH}_{\beta\text{b}}$ ) and

-6.93 (s, 1H, PyH $\beta$ 'b). ESI-MS (m/z): [M-2CF<sub>3</sub>SO<sub>3</sub>]<sup>2+</sup> = 275.09 (100%), [M-CF<sub>3</sub>SO<sub>3</sub>]<sup>+</sup> = 699.13 (6%). UV-Vis (CH<sub>3</sub>CN):  $\lambda_{\text{max}}$  = 455 nm,  $\epsilon$  = 4500 M<sup>-1</sup>cm<sup>-1</sup>,  $\lambda$  = 750 nm,  $\epsilon$  = 200 M<sup>-1</sup>cm<sup>-1</sup>.

Preparation of [Fe<sup>IV</sup>(NTs)(Me<sub>2</sub>(CHPy<sub>2</sub>)tacn)]<sup>2+</sup> (**2**<sup>(IV)</sup>=NTs) with PhINTs. In an anaerobic glovebox, **2**<sup>(III)</sup> (1.8 mg, 2.5·10<sup>-3</sup> mmol) and PhINTs (1.12 mg, 3·10<sup>-3</sup> mmol) were mixed in CH<sub>3</sub>CN (1 mL). The resulting solution was vigorously stirred until total formation of **2**<sup>(IV)</sup>=NTs. Removal of unreacted PhINTs was achieved by filtration, which afforded a golden – orange solution of compound **2**<sup>(IV)</sup>=NTs. The yield of the reaction was estimated according to the amount of Fe<sup>IV</sup> determined by Mössbauer spectroscopy by preparation of a <sup>57</sup>Fe enriched sample of compound **2**<sup>(IV)</sup>=NTs. Yield: 48 %. (The same procedure in acetone gave 81 % yield of **2**<sup>(IV)</sup>=NTs). <sup>1</sup>H – NMR (CD<sub>3</sub>CN, 400 MHz, 300 K)  $\delta$ , ppm: 20.87 (s, PyH $\beta$ ), 9.70 (s, PyH $\gamma$ ), -6.56 (s, PyH $\beta$ ''). ESI – MS (m/z): [M-2CF<sub>3</sub>SO<sub>3</sub>]<sup>2+</sup> = 275.09 (100%), [M-CF<sub>3</sub>SO<sub>3</sub>]<sup>+</sup> = 699.13 (2%). UV-Vis (CH<sub>3</sub>CN):  $\lambda_{\text{max}}$  = 456 nm,  $\epsilon$  = 3600 M<sup>-1</sup>cm<sup>-1</sup>,  $\lambda$  = 740 nm,  $\epsilon$  = 170 M<sup>-1</sup>cm<sup>-1</sup>. (Acetone):  $\lambda_{\text{max}}$  = 455 nm,  $\epsilon$  = 4000 M<sup>-1</sup>cm<sup>-1</sup>,  $\lambda$  = 730 nm,  $\epsilon$  = 230 M<sup>-1</sup>cm<sup>-1</sup>.

Preparation of [Fe<sup>IV</sup>(NTs)(N4Py)]<sup>2+</sup> (**3**<sup>(IV)</sup>=NTs) with PhINTs. **3**<sup>(IV)</sup>=NTs was prepared as previously reported.<sup>8</sup>

Preparation of [Fe<sup>III</sup>(NHTs)(MePy<sub>2</sub>tacn)](X)<sub>2</sub> ([**1**<sup>(III)</sup> – NHTs]X, X = OTf or SbF<sub>6</sub>). [**1**<sup>(III)</sup> – NHTs]X, (X = OTf or SbF<sub>6</sub>) was prepared in an anaerobic glovebox by reacting **1**<sup>(III)</sup>-X (15 mg **1**<sup>(III)</sup>-OTf or 18.6 mg of **1**<sup>(III)</sup> – SbF<sub>6</sub>, 2.1·10<sup>-2</sup> mmol) with 1.2 eq of PhINTs (9.3 mg, 2.4·10<sup>-2</sup> mmol) in acetone (3 mL) at -40°C. The resulting solution was vigorously stirred 1 – 2 minutes, covered with a layer of hexamethyldisiloxane or diethyl ether and stored at -40 °C for several days. The resulting orange crystals were separated and characterised spectroscopically as described in the text.

Preparation of [Fe<sup>III</sup>(NHTs)(Me<sub>2</sub>(CHPy<sub>2</sub>)tacn)]X<sub>2</sub> ([**2**<sup>(III)</sup> – NHTs]X, X = OTf or SbF<sub>6</sub>) was done analogously to [**1**<sup>(III)</sup> – NHTs]X.

### 3. Reactivity studies

Kinetic Studies in the reaction with sulphides. The required amount of **1**<sup>(IV)</sup>=NTs or **2**<sup>(IV)</sup>=NTs (200  $\mu$ L of a 2.5 mM solution of **1**<sup>(IV)</sup>=NTs or **2**<sup>(IV)</sup>=NTs in CH<sub>3</sub>CN obtained by direct oxidation of **1**<sup>(III)</sup> and **2**<sup>(III)</sup> with PhINTs) was diluted in CH<sub>3</sub>CN to obtain the desired final concentration of **1**<sup>(IV)</sup>=NTs or **2**<sup>(IV)</sup>=NTs.

Then, the desired quantity of thioanisole ( $^X\text{PhSMe}$ , dissolved in  $\text{CH}_3\text{CN}$ ) was added. The progress of the reaction was monitored by UV – vis spectroscopy at 293 K.

**Identification and quantification of sulfilimine.** Reaction of  $\mathbf{1}^{(\text{IV})}=\text{NTs}$  or  $\mathbf{2}^{(\text{IV})}=\text{NTs}$  with sulfides ( $^X\text{PhSMe}$ ) caused a decay of its characteristic absorption bands ( $\lambda_{\text{max}} = 455/456$  and  $750/740$  nm). After full decay of this band, an internal standard was added to the solution (trimethoxybenzene) and the amount of formed sulfilimine was quantified by  $^1\text{H}$  – NMR spectroscopy by comparison with independently prepared samples of the products. All quantifications had been done with 5 mg ( $7 \cdot 10^{-3}$  mmol) of  $\mathbf{1}^{(\text{IV})}=\text{NTs}$  and  $\mathbf{2}^{(\text{IV})}=\text{NTs}$  and PhINTs (3.12 mg,  $8.3 \cdot 10^{-3}$  mmol) in 2 ml of acetone. Blank experiments without iron complex revealed  $\approx 0.1$  eq of sulfilimine products.

**HAT Kinetic Studies.** The required amount of  $\mathbf{1}^{(\text{IV})}=\text{NTs}$  or  $\mathbf{2}^{(\text{IV})}=\text{NTs}$  (200  $\mu\text{L}$  of a 2.5 mM solution of  $\mathbf{1}^{(\text{IV})}=\text{NTs}$  or  $\mathbf{2}^{(\text{IV})}=\text{NTs}$  in acetone obtained by direct oxidation of  $\mathbf{1}^{(\text{III})}$  and  $\mathbf{2}^{(\text{III})}$  with PhINTs) was diluted in acetone to obtain the desired final concentration of 0.25 mM. Then, the desired quantity of a selected substrate (xanthene, DHA, CHD and fluorene, dissolved in acetone) was added. The substrates were added in large excess (1 mM – 25 mM) compare to  $\mathbf{1}^{(\text{IV})}=\text{NTs}$  or  $\mathbf{2}^{(\text{IV})}=\text{NTs}$  (0.25 mM). The progress of the reaction was monitored by UV-Vis spectroscopy at 293 K. The decay kinetic of  $\mathbf{1}^{(\text{IV})}=\text{NTs}$  or  $\mathbf{2}^{(\text{IV})}=\text{NTs}$ , which is produced upon substrate addition, in acetone at 20  $^\circ\text{C}$  and under  $\text{N}_2$  atmosphere, lead to the formation of  $\mathbf{1}^{(\text{III})}\text{-NHTs}$  or  $\mathbf{2}^{(\text{III})}\text{-NHTs}$  species and substrate oxidation products.

The decay of  $\mathbf{1}^{(\text{IV})}=\text{NTs}$  or  $\mathbf{2}^{(\text{IV})}=\text{NTs}$  follow an exponential behaviour upon addition of different substrates and concentrations. Surprisingly, the observed rates ( $k_{\text{obs}}$ ,  $\text{s}^{-1}$ ), extrapolated from the exponential fits, do not vary linearly with the substrates concentrations and instead saturation profiles are observed (Figure 10 A and B of the main article). Saturation of the observed rates is generally observed when a fast pre-equilibrium reaction step precedes a slower irreversible step in the reaction mechanism. The values of  $k(\text{s}^{-1})$  and  $\text{Keq}(\text{M}^{-1})$  (extrapolated fitting the observed curves with the pre-equilibrium approximation, Equation 1 of the main article) are reported in Table 6 of the main article.

The extrapolated values of rates  $k$  ( $\text{s}^{-1}$ ) (which in this model correspond to the rate of the slow and irreversible reaction step that follow the pre-equilibrium) shown a linear variation with the BDE of

the studied substrate and by plotting the logarithm of the rate corrected for the number of CH contained in each substrate (**Figure S11**).

#### 4. Characterization and kinetic data

##### Spectroscopic and MS monitoring of the generation of $2^{(IV)}=NTs$

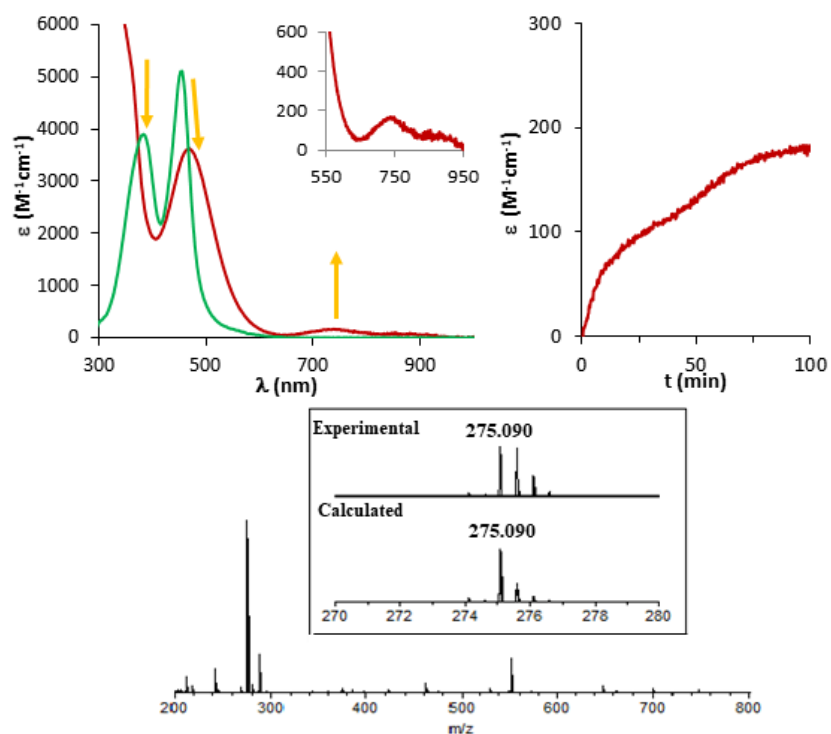

**Figure S1.** (Top) UV – vis spectra of oxidation of  $2^{(III)}$  to  $2^{(IV)}=NTs$  in MeCN at 20°C, HR – MS spectrum of  $2^{(IV)}=NTs$  prepared in  $CH_3CN$  exhibiting a base peak at  $m/z$  275.09; inset show amplification of major peak for  $[Fe^{IV}(NTs)(Me_2(CHPy)_2)tacn]^{2+}$  species. Proper simulation of the peaks requires inclusion of  $\approx 50\%$  of  $[Fe^{III}(NHTs)(L)]^{2+}$  in the isotopic pattern corresponding to  $[Fe^{IV}(NTs)(L)]^{2+}$ .



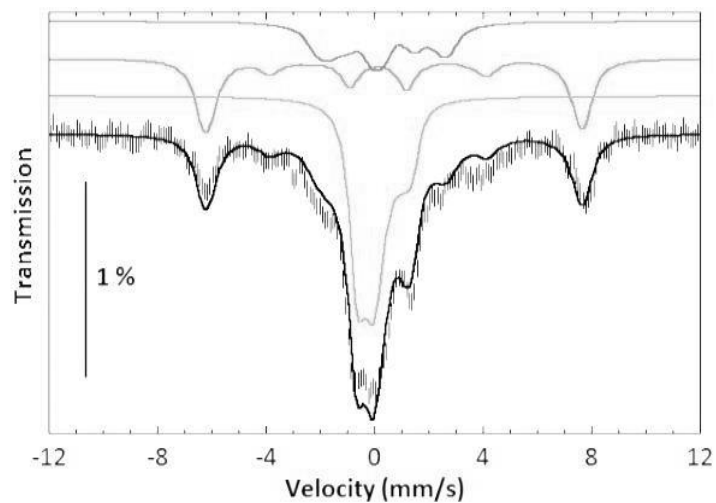

**Figure S2.** Mossbauer spectra of the reaction of  $2^{(III)}\text{OTf}$  with PhINTs in  $\text{CH}_3\text{CN}$  showing accumulation of 48% of  $2^{(IV)}=\text{NTS}$ .

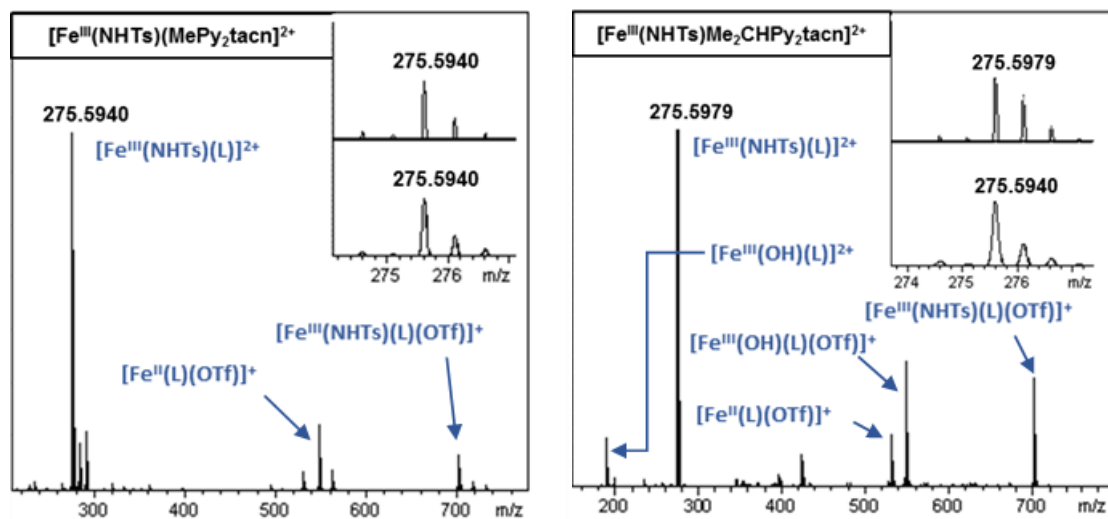

**Figure S3.** HR – MS of isolated  $[1^{(III)} - \text{NHTs}](\text{OTf})_2$  (left) and  $[2^{(III)} - \text{NHTs}](\text{OTf})_2$  (right) in  $\text{CH}_3\text{CN}$ .

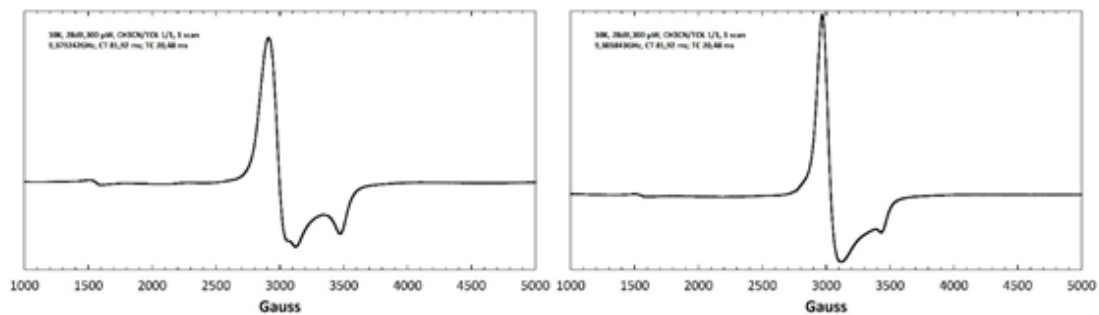

Figure S4. EPR spectra of isolated  $[\mathbf{1}^{\text{III}} - \text{NHTs}](\text{OTf})_2$  (left) and  $[\mathbf{2}^{\text{III}} - \text{NHTs}](\text{OTf})_2$  (right) at 4.2K.

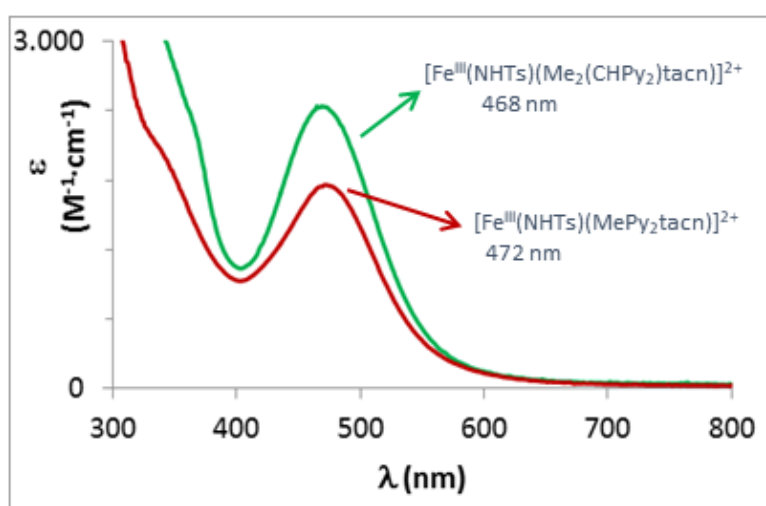

Figure S5. UV-vis spectra of isolated  $\mathbf{1}^{\text{III}} - \text{NHTs}$  and  $\mathbf{2}^{\text{III}} - \text{NHTs}$  in MeCN at 20 °C.

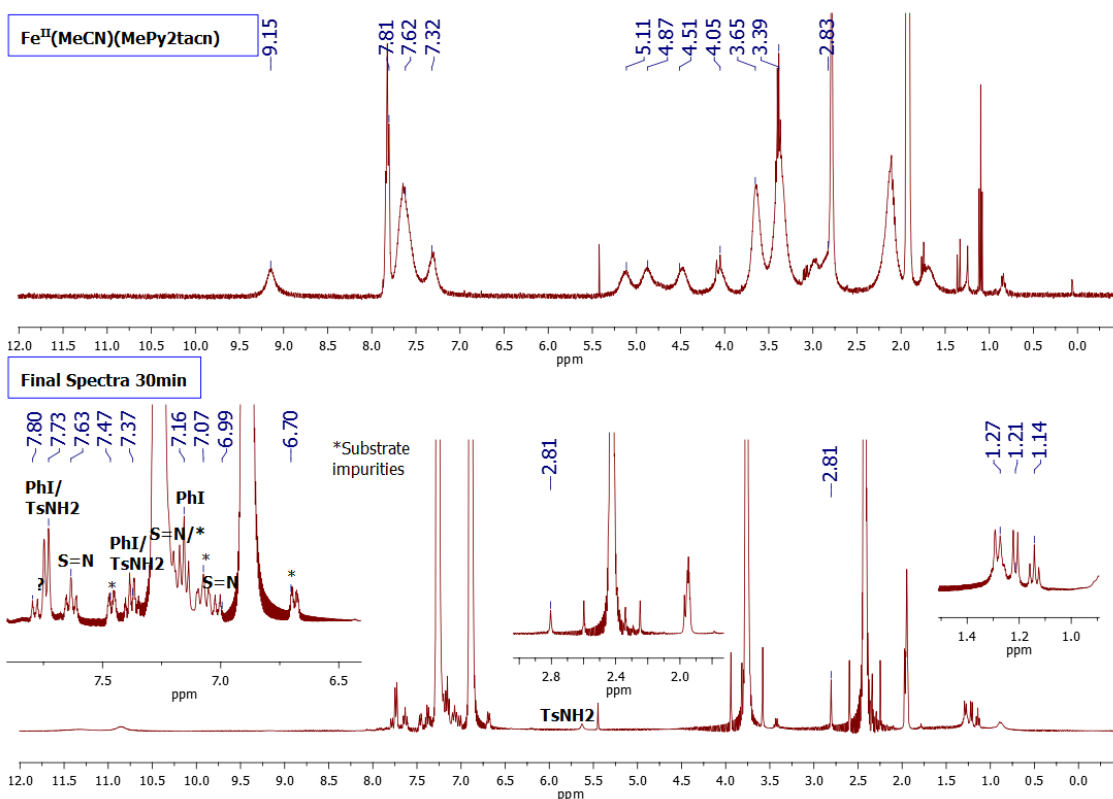

**Figure S6.**  $^1\text{H}$  – NMR spectra of: (Top)  $[\text{Fe}^{\text{II}}(\text{MeCN})(\text{MePy}_2\text{tacn})](\text{OTf})_2$ ,  $\mathbf{1}^{\text{(III)}}\text{OTf}$ , in  $\text{CD}_3\text{CN}$ ; (below) reaction of  $\mathbf{1}^{\text{(IV)}}=\text{NTs}$  with  $\text{MeOPhSMc}$  in  $\text{CD}_3\text{CN}$  after 30 minutes time.

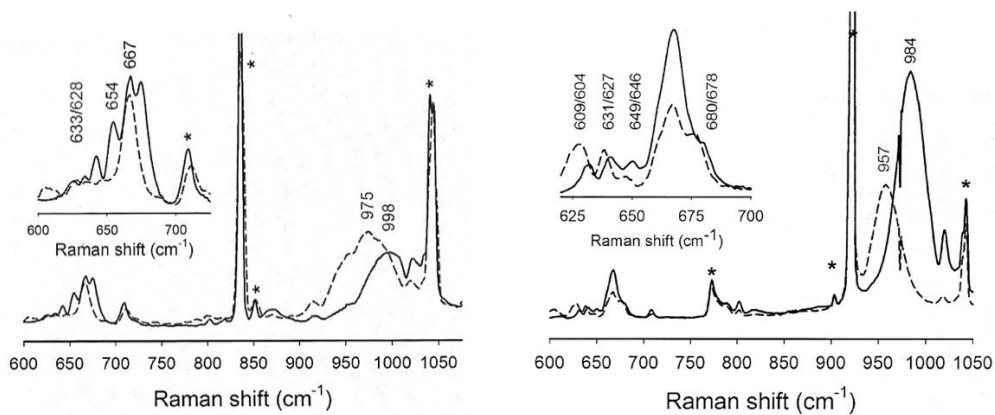

**Figure S6A.** Resonance Raman spectra of  $[\text{Fe}^{\text{IV}}(\text{NTs})(\text{N4Py})]^{2+}$  ( $\mathbf{3}$ ) (left panel showing  $^{14}\text{NTs}$  (solid line) and  $^{15}\text{NTs}$  (dashed line) isotopomers) and  $[\text{Fe}^{\text{IV}}(\text{NTs})(\text{BnTPEN})]^{2+}$  ( $\mathbf{4}$ ) (right panel showing  $^{14}\text{NTs}$  (solid line) and  $^{15}\text{NTs}$  (dashed line) isotopomers).<sup>9</sup>

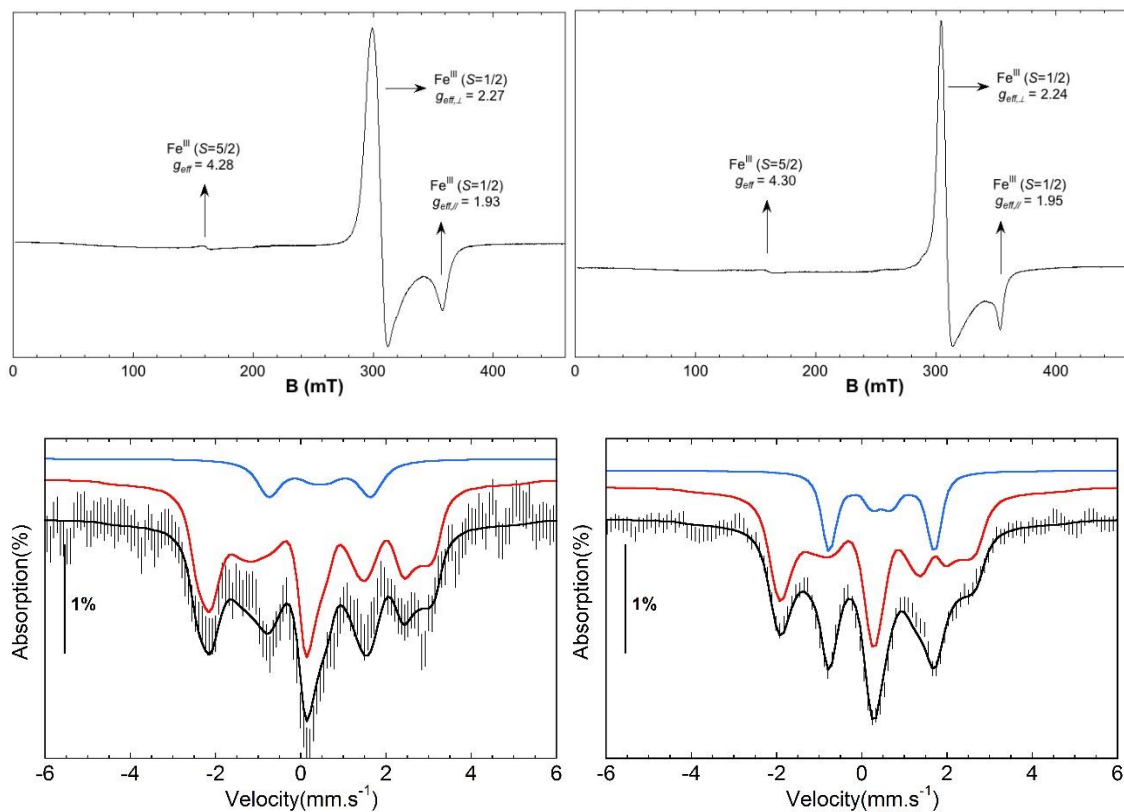

| Complex                    | S                 | $g_x/g_y/g_z$ | $\delta$               | $\Delta E_Q$           | $\Gamma$               | H    | $A_x/g_n\mu_n$ | $A_y/g_n\mu_n$ | $A_z/g_n\mu_n$ | %   |           |
|----------------------------|-------------------|---------------|------------------------|------------------------|------------------------|------|----------------|----------------|----------------|-----|-----------|
|                            |                   |               | ( $\text{mm.s}^{-1}$ ) | ( $\text{mm.s}^{-1}$ ) | ( $\text{mm.s}^{-1}$ ) |      |                |                |                |     | (T)       |
| <b>1<sup>(IV)</sup>NTs</b> | Fe <sup>III</sup> | 1/2           | 2.26/2.26/1.93         | 0.25                   | -1.8                   | 0.38 | 0.66           | -46            | 2              | 4   | <b>86</b> |
|                            | Fe <sup>II</sup>  | 0             |                        | 0.45                   | 0.45                   | 0.6  | 1              |                |                |     | <b>14</b> |
| <b>2<sup>(IV)</sup>NTs</b> | Fe <sup>III</sup> | 1/2           | 2.24/2.24/1.95         | 0.25                   | -1.7                   | 0.42 | 0.66           | -40.5          | -3.8           | 2.1 | <b>73</b> |
|                            | Fe <sup>II</sup>  | 0             |                        | 0.47                   | 0.55                   | 0.3  | 0              |                |                |     | <b>23</b> |

**Figure S7 and Table S1.** Spectroscopic properties (EPR, top and Mossbauer, bottom) of iron species resulting from reaction of **1<sup>(IV)</sup>NTs** (left panels) and **2<sup>(IV)</sup>NTs** (right panels) with *p*-Me<sup>o</sup>PhSMe. Black

hatched bars: experimental spectrum, blue line Fe<sup>II</sup> contribution, red line Fe<sup>III</sup> contribution. Table S1 collects the corresponding spectroscopic parameters.

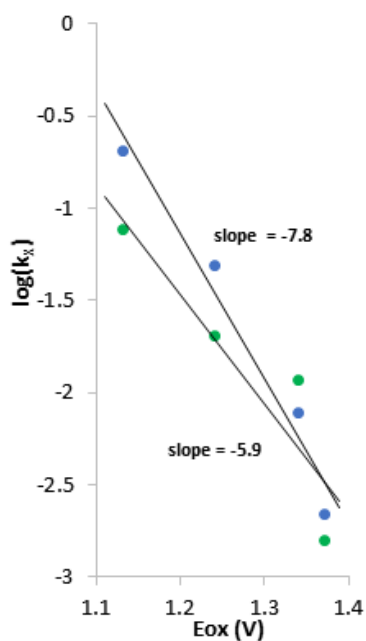

**Figure S8.** Plot Eox vs log(k<sub>x</sub>) in the reactions of **1<sup>(IV)</sup>=NTs** (green circles) and **2<sup>(IV)</sup>=NTs** (blue circles) with *p*-XPhSMe substrates.

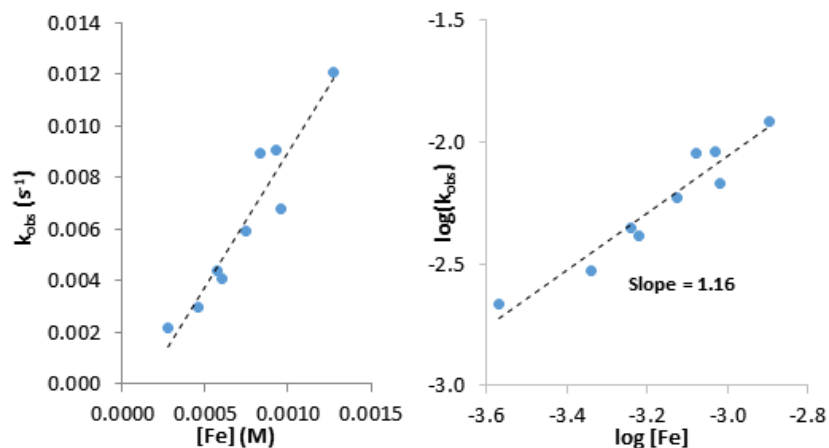

**Figure S9.** (Left) Rate dependence on [Fe] for the reaction of **1<sup>(IV)</sup>=NTs** with MeOPhSMe. (Right) log(k<sub>obs</sub>) vs log([**1<sup>(IV)</sup>=NTs**]) in the reaction of **1<sup>(IV)</sup>=NTs** with MeOPhSMe.

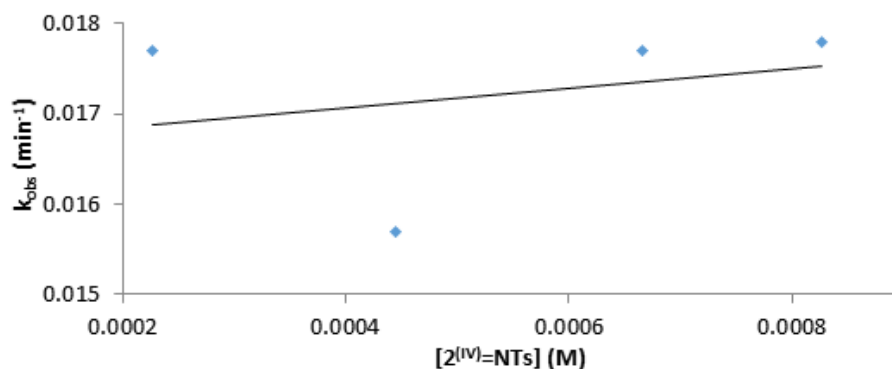

**Figure S10.** Dependence of  $k_{obs}$  on  $[Fe]$  in the reaction of  $2^{(IV)}=NTs$  with  $^cPhSMe$  (0.09 M) in MeCN.

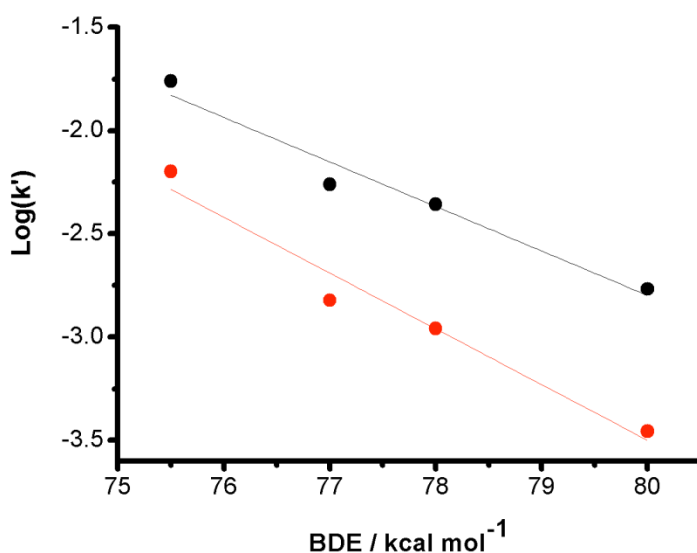

**Figure S11.** Plot of the logarithm of the extrapolated second order rate  $k$  ( $s^{-1}$ ) values corrected by the number of CH ( $nH$ ) contained in each substrate ( $\text{Log}(k / nH) = \text{Log}(k')$ ) for the reaction of different hydrocarbons substrates with  $1^{(IV)}=NTs$  (black dots) and  $2^{(IV)}=NTs$  (red dots), plotted versus the BDE of the studied substrates. The data exhibit linear regressions with slopes of  $-0.21$  and  $-0.26$   $\text{kcal} \cdot \text{mol}^{-1}$  for  $1^{(IV)}=NTs$  and  $2^{(IV)}=NTs$  complexes, respectively.

The procedure described before, and adopted to analyze the reaction kinetic in presence of different CH substrates and concentrations, was also applied to study DHA-d4. The profiles observed are shown in Figure 9 C and D of the main manuscript and the corresponding  $k(s^{-1})$  and  $Keq(M^{-1})$  values reported in Table S2.

**Table S2.**  $k(s^{-1})$  and  $Keq(M^{-1})$  values for the reaction of  $1^{(IV)}=NTs$  and  $2^{(IV)}=NTs$  with DHA and DH4-d4.

| Substrate | $1^{(IV)}=NTs$           |                | $2^{(IV)}=NTs$           |               |
|-----------|--------------------------|----------------|--------------------------|---------------|
|           | $k, s^{-1}/ Keq, M^{-1}$ |                | $k, s^{-1}/ Keq, M^{-1}$ |               |
| DHA       | $2.2(\pm 0.2)E-02$       | $315(\pm 81)$  | $6.0(\pm 0.6)E-03$       | $227(\pm 67)$ |
| DHA-d4    | $5.2(\pm 0.6)E-03$       | $390(\pm 115)$ | $8.3(\pm 0.4)E-04$       | $314(\pm 74)$ |

The reaction of  $1^{(IV)}=NTs$  with DHA was also studied in acetonitrile. The results obtained are represented in **Figure S12** and the  $k(s^{-1})$  and  $Keq(M^{-1})$  values reported in **Table S3**.

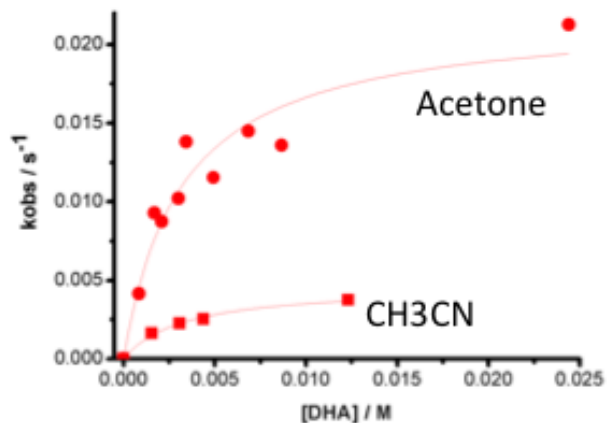

**Figure S12.** Plot of  $k_{obs}$  vs substrate concentration for the reaction of  $1^{(IV)}=NTs$  complex with DHA in acetonitrile and acetone.

**Table S3.**  $k(s^{-1})$  and  $Keq(M^{-1})$  values for the reaction of  $1^{(IV)}=NTs$  with DHA in acetonitrile and acetone.

| Substrate              | $k, s^{-1}/ Keq, M^{-1}$ |               |
|------------------------|--------------------------|---------------|
| DHA-acetone            | $2.2(\pm 0.2)E-02$       | $315(\pm 81)$ |
| DHA-CH <sub>3</sub> CN | $4.7(\pm 0.3)E-03$       | $301(\pm 44)$ |

**Table S4:** Selected EXAFS fits for , **1<sup>(III)</sup> – NHTs**. Fits carried out in r-space ( $\Delta k = 2-12.0 \text{ \AA}^{-1}$ ;  $\Delta r = 1-3 \text{ \AA}$ ) with a Hanning window (dk 2), a  $k$ -weight = 3 and  $S_0 = 0.9$ . Bond distances and disorder parameters ( $\Delta r_{\text{eff}}$  and  $\sigma^2$ ) were allowed to float having initial values of  $0.0 \text{ \AA}$  and  $0.003 \text{ \AA}^2$  respectively, with a universal  $E_0$  and  $\Delta E_0 = 0 \text{ eV}$ . (Fits highlighted in blue are the best models;  $\sigma^2$  reported as  $\times 10^3 \text{ \AA}^2$ ).

| FIT | $\Delta k$ | $\Delta r$ | Var. | $R_{\text{FACTOR}}$ | $\chi^2_{\text{v}}$ | $\Delta E_0$ | Ni-N/O* |                   |            | Ni-N/O* |                   |            | Ni--C |                   |            | Ni-C |                   |            | Ni--C-N--Ni |                   |            |
|-----|------------|------------|------|---------------------|---------------------|--------------|---------|-------------------|------------|---------|-------------------|------------|-------|-------------------|------------|------|-------------------|------------|-------------|-------------------|------------|
|     |            |            |      |                     |                     |              | N       | r( $\text{\AA}$ ) | $\sigma^2$ | N       | r( $\text{\AA}$ ) | $\sigma^2$ | N     | r( $\text{\AA}$ ) | $\sigma^2$ | N    | r( $\text{\AA}$ ) | $\sigma^2$ | N           | r( $\text{\AA}$ ) | $\sigma^2$ |
| 1   | 2-12.0     | 1-2        | 3    | 0.072               | 255                 | 1(3)         | -       | -                 | -          | 4       | 1.99(3)           | 3(2)       |       |                   |            |      |                   |            |             |                   |            |
| 2   | 2-12.0     | 1-2        | 3    | 0.045               | 158.5               | 0(3)         | -       | -                 | -          | 6       | 1.99(3)           | 8(2)       |       |                   |            |      |                   |            |             |                   |            |
| 3   | 2-12.0     | 1-2        | 3    | 0.051               | 177.2               | 0(3)         | -       | -                 | -          | 5       | 1.99(2)           | 5(2)       |       |                   |            |      |                   |            |             |                   |            |
| 4   | 2-12.0     | 1-2        | 3    | 0.041               | 144.1               | -2(3)        | 1       | 1.84(2)           | 5(2)       | 5       | 1.99(2)           | 5(2)       |       |                   |            |      |                   |            |             |                   |            |
| 5   | 2-12.0     | 1-3        | 3    | 0.164               | 239.2               | 0(3)         | 1       | 1.85(3)           | 5(2)       | 5       | 2.00(3)           | 5(2)       |       |                   |            |      |                   |            |             |                   |            |
| 6   | 2-12.0     | 1-3        | 5    | 0.019               | 37.1                | -2(1)        | 1       | 1.84(1)           | 4(1)       | 4       | 1.99(1)           | 4(1)       | 7     | 2.88(2)           | 4(1)       | 3    | 3.12(3)           | 4(1)       | 18          | 3.24(3)           | 4(1)       |
| 7   | 2-12.0     | 1-3        | 5    | 0.026               | 49.8                | -1(1)        | -       | -                 | -          | 6       | 1.98(1)           | 9(1)       | 7     | 2.88(3)           | 9(1)       | 3    | 3.15(4)           | 9(1)       | 18          | 3.27(4)           | 9(1)       |
| 8   | 2-12.0     | 1-3        | 5    | 0.017               | 33.0                | -1(1)        | -       | -                 | -          | 5       | 1.98(1)           | 6(1)       | 7     | 2.89(2)           | 6(1)       | 3    | 3.15(3)           | 6(1)       | 18          | 3.27(3)           | 6(1)       |
| 9   | 2-12.0     | 1-3        | 5    | 0.016               | 32.0                | -2(1)        | 1       | 1.84(1)           | 6(1)       | 5       | 1.99(1)           | 6(1)       | 7     | 2.87(2)           | 6(1)       | 3    | 3.12(3)           | 6(1)       | 18          | 3.25(3)           | 6(1)       |

\*Although EXAFS can not differentiate between O/N/C scattering paths, chemical intuition was used for description to facilitate comparison

**Table S5:** Selected EXAFS fits for , **2<sup>(III)</sup> – NHTs**. Fits carried out in r-space ( $\Delta k = 2-10.0 \text{ \AA}^{-1}$ ;  $\Delta r = 1-3 \text{ \AA}$ ) with a Hanning window (dk 2), a  $k$ -weight = 3 and  $S_0 = 0.9$ . Bond distances and disorder parameters ( $\Delta r_{\text{eff}}$  and  $\sigma^2$ ) were allowed to float having initial values of  $0.0 \text{ \AA}$  and  $0.003 \text{ \AA}^2$  respectively, with a universal  $E_0$  and  $\Delta E_0 = 0 \text{ eV}$ . (Fits highlighted in blue are the best models;  $\sigma^2$  reported as  $\times 10^3 \text{ \AA}^2$ ).

| FIT | $\Delta k$ | $\Delta r$ | Var. | $R_{\text{FACTOR}}$ | $\chi^2_{\text{v}}$ | $\Delta E_0$ | Ni-N/O* |                   |            | Ni-N/O* |                   |            | Ni--C |                   |            | Ni-C |                   |            | Ni--C-N--Ni |                   |            |
|-----|------------|------------|------|---------------------|---------------------|--------------|---------|-------------------|------------|---------|-------------------|------------|-------|-------------------|------------|------|-------------------|------------|-------------|-------------------|------------|
|     |            |            |      |                     |                     |              | N       | r( $\text{\AA}$ ) | $\sigma^2$ | N       | r( $\text{\AA}$ ) | $\sigma^2$ | N     | r( $\text{\AA}$ ) | $\sigma^2$ | N    | r( $\text{\AA}$ ) | $\sigma^2$ | N           | r( $\text{\AA}$ ) | $\sigma^2$ |
| 1   | 2-10       | 1-2        | 3    | 0.021               | 5.1                 | 1(2)         | -       | -                 | -          | 6       | 2.01(2)           | 10(2)      |       |                   |            |      |                   |            |             |                   |            |
| 2   | 2-10       | 1-2        | 3    | 0.022               | 5.5                 | 2(2)         | -       | -                 | -          | 5       | 2.01(2)           | 7(2)       |       |                   |            |      |                   |            |             |                   |            |
| 3   | 2-10       | 1-2        | 3    | 0.042               | 10.3                | 2(3)         | -       | -                 | -          | 4       | 2.01(3)           | 4(2)       |       |                   |            |      |                   |            |             |                   |            |
| 4   | 2-10       | 1-2        | 3    | 0.044               | 10.8                | 0(4)         | 1       | 1.84(3)           | 3(3)       | 4       | 2.01(3)           | 3(3)       |       |                   |            |      |                   |            |             |                   |            |
| 5   | 2-10       | 1-2        | 3    | 0.030               | 7.3                 | 0(3)         | 1       | 1.84(3)           | 6(2)       | 5       | 2.01(3)           | 6(2)       |       |                   |            |      |                   |            |             |                   |            |
| 6   | 2-10       | 1-2        | 3    | 0.025               | 6.2                 | 1(3)         | 0.5     | 1.83(3)           | 6(2)       | 5       | 2.01(3)           | 6(2)       |       |                   |            |      |                   |            |             |                   |            |
| 7   | 2-10       | 1-3        | 3    | 0.143               | 12.6                | 1(3)         | 1       | 1.85(4)           | 6(3)       | 5       | 2.02(4)           | 6(3)       |       |                   |            |      |                   |            |             |                   |            |
| 8   | 2-10       | 1-3        | 4    | 0.034               | 3.5                 | 1(2)         | -       | -                 | -          | 6       | 2.00(2)           | 9(1)       | 4     | 2.87(5)           | 9(1)       | 3    | 3.02(5)           | 9(1)       | 3           | 3.12(5)           | 9(1)       |
| 9   | 2-10       | 1-3        | 4    | 0.019               | 2.0                 | 0(1)         | -       | -                 | -          | 5       | 2.01(1)           | 7(1)       | 4     | 2.87(3)           | 7(1)       | 3    | 3.02(3)           | 7(1)       | 3           | 3.12(3)           | 7(1)       |
| 10  | 2-10       | 1-3        | 4    | 0.017               | 1.7                 | 1(1)         | -       | -                 | -          | 4       | 2.00(1)           | 4(1)       | 4     | 2.87(2)           | 4(1)       | 3    | 3.02(2)           | 4(1)       | 3           | 3.12(2)           | 4(1)       |
| 11  | 2-10       | 1-3        | 4    | 0.028               | 2.9                 | 0(1)         | 1       | 1.84(1)           | 3(1)       | 4       | 2.01(1)           | 3(1)       | 4     | 2.85(3)           | 3(1)       | 3    | 3.00(3)           | 3(1)       | 3           | 3.10(3)           | 3(1)       |
| 12  | 2-10       | 1-3        | 4    | 0.024               | 2.4                 | 1(1)         | 0.5     | 1.83(1)           | 7(1)       | 5       | 2.01(1)           | 7(1)       | 4     | 2.86(3)           | 7(1)       | 3    | 3.01(3)           | 7(1)       | 3           | 3.11(3)           | 7(1)       |
| 11  | 2-10       | 1-3        | 4    | 0.032               | 3.9                 | 0(1)         | 1       | 1.84(2)           | 7(3)       | 5       | 2.02(2)           | 7(3)       | 4     | 2.85(2)           | 7(3)       | 3    | 3.00(4)           | 7(3)       | 3           | 3.10(4)           | 7(3)       |

\*Although EXAFS can not differentiate between O/N/C scattering paths, chemical intuition was used for description to facilitate comparison

**Table S6:** Selected EXAFS fits for , **1<sup>(IV)</sup> – NTs**. Fits carried out in r-space ( $\Delta k = 2-12.5 \text{ \AA}^{-1}$ ;  $\Delta r = 1-3 \text{ \AA}$ ) with a Hanning window (dk 2), a  $k$ -weight = 3 and  $S_0 = 0.9$ . Bond distances and disorder parameters ( $\Delta r_{\text{eff}}$  and  $\sigma^2$ ) were allowed to float having initial values of  $0.0 \text{ \AA}$  and  $0.003 \text{ \AA}^2$  respectively, with a universal  $E_0$  and  $\Delta E_0 = 0 \text{ eV}$ . (Fits highlighted in blue are the best models;  $\sigma^2$  reported as  $\times 10^3 \text{ \AA}^2$ ).

| FIT | $\Delta k$ | $\Delta r$ | Var. | $R_{\text{FACTOR}}$ | $\chi^2_{\text{v}}$ | $\Delta E_0$ | Ni-N/O* |                   |            | Ni-N/O* |                   |            | Ni--C |                   |            | Ni-C |                   |            | Ni--C-N--Ni |                   |            |
|-----|------------|------------|------|---------------------|---------------------|--------------|---------|-------------------|------------|---------|-------------------|------------|-------|-------------------|------------|------|-------------------|------------|-------------|-------------------|------------|
|     |            |            |      |                     |                     |              | N       | r( $\text{\AA}$ ) | $\sigma^2$ | N       | r( $\text{\AA}$ ) | $\sigma^2$ | N     | r( $\text{\AA}$ ) | $\sigma^2$ | N    | r( $\text{\AA}$ ) | $\sigma^2$ | N           | r( $\text{\AA}$ ) | $\sigma^2$ |
| 1   | 2-12.5     | 1-2        | 3    | 0.082               | 13.3                |              | -       | -                 | -          | 5       | 2.00(2)           | 3(2)       |       |                   |            |      |                   |            |             |                   |            |
| 2   | 2-12.5     | 1-2        | 3    | 0.010               | 16.7                | 1(3)         | -       | -                 | -          | 6       | 2.00(3)           | 6(2)       |       |                   |            |      |                   |            |             |                   |            |
| 3   | 2-12.5     | 1-2        | 3    | 0.059               | 9.5                 | -1(2)        | 1       | 1.71(2)           | 4(1)       | 6       | 1.98(2)           | 4(1)       |       |                   |            |      |                   |            |             |                   |            |
| 4   | 2-12.5     | 1-2        | 3    | 0.130               | 21.2                | -1(4)        | 1       | 1.71(2)           | 1(2)       | 4       | 1.98(2)           | 1(2)       |       |                   |            |      |                   |            |             |                   |            |
| 5   | 2-12.5     | 1-2        | 3    | 0.070               | 11.9                | -1(3)        | 1       | 1.71(2)           | 2(1)       | 5       | 1.98(2)           | 2(1)       |       |                   |            |      |                   |            |             |                   |            |
| 6   | 2-12.5     | 1-3        | 3    | 0.222               | 17.0                | 0(3)         | 1       | 1.72(2)           | 2(2)       | 5       | 1.99(2)           | 2(2)       |       |                   |            |      |                   |            |             |                   |            |
| 7   | 2-12.5     | 1-3        | 5    | 0.043               | 4.1                 | 1(1)         | 1       | 1.71(1)           | 1(1)       | 4       | 1.98(1)           | 1(1)       | 7     | 2.84(2)           | 1(1)       | 4    | 3.06(3)           | 1(1)       | 10          | 3.23(3)           | 1(1)       |
| 8   | 2-12.5     | 1-3        | 5    | 0.059               | 5.6                 | 2(1)         | -       | -                 | -          | 5       | 2.00(1)           | 3(1)       | 7     | 2.85(3)           | 3(1)       | 4    | 3.08(6)           | 3(1)       | 10          | 3.26(6)           | 3(1)       |
| 9   | 2-12.5     | 1-3        | 5    | 0.026               | 2.5                 | 1(1)         | 1       | 1.71(1)           | 2(1)       | 5       | 1.99(1)           | 2(1)       | 7     | 2.84(1)           | 2(1)       | 4    | 3.07(3)           | 2(1)       | 10          | 3.25(3)           | 2(1)       |

\*Although EXAFS can not differentiate between O/N/C scattering paths, chemical intuition was used for description to facilitate comparison



**Table S7:** Selected EXAFS fits for  $\mathbf{2}^{(IV)} - \text{NTs}$ . Fits carried out in r-space ( $\Delta k = 2-12.5 \text{ \AA}^{-1}$ ;  $\Delta r = 1-3 \text{ \AA}$ ) with a Hanning window (dk 2), a  $k$ -weight = 3 and  $S_0 = 0.9$ . Bond distances and disorder parameters ( $\Delta r_{\text{eff}}$  and  $\sigma^2$ ) were allowed to float having initial values of  $0.0 \text{ \AA}$  and  $0.003 \text{ \AA}^2$  respectively, with a universal  $E_0$  and  $\Delta E_0 = 0 \text{ eV}$ . (Fits highlighted in blue are the best models;  $\sigma^2$  reported as  $\times 10^3 \text{ \AA}^2$ ).

| FIT | $\Delta k$ | $\Delta r$ | Var. | $R_{\text{FACTOR}}$ | $\chi^2_{\nu}$ | $\Delta E_0$ | Ni-N/O* |                 |            | Ni-N/O* |                 |            | Ni-C |                 |            | Ni-C |                 |            | Ni-C-N-Ni |                 |            |    |         |        |
|-----|------------|------------|------|---------------------|----------------|--------------|---------|-----------------|------------|---------|-----------------|------------|------|-----------------|------------|------|-----------------|------------|-----------|-----------------|------------|----|---------|--------|
|     |            |            |      |                     |                |              | N       | $r(\text{\AA})$ | $\sigma^2$ | N       | $r(\text{\AA})$ | $\sigma^2$ | N    | $r(\text{\AA})$ | $\sigma^2$ | N    | $r(\text{\AA})$ | $\sigma^2$ | N         | $r(\text{\AA})$ | $\sigma^2$ |    |         |        |
| 1   | 2-12.5     | 1-2        | 3    | 0.112               | 33.8           | -9(5)        | -       | -               | -          | 6       | 1.99(2)         | 6(1)       |      |                 |            |      |                 |            |           |                 |            |    |         |        |
| 2   | 2-12.5     | 1-2        | 3    | 0.067               | 20.2           | -8(4)        | -       | -               | -          | 5       | 1.99(2)         | 4(1)       |      |                 |            |      |                 |            |           |                 |            |    |         |        |
| 3   | 2-12.5     | 1-2        | 3    | 0.0375              | 11.3           | -8(3)        | 1       | 1.71(1)         | 3(1)       | 4       | 1.98(1)         | 3(1)       |      |                 |            |      |                 |            |           |                 |            |    |         |        |
| 4   | 2-12.5     | 1-2        | 3    | 0.016               | 4.9            | -8(2)        | 1       | 1.71(1)         | 4.2(4)     | 5       | 1.99(1)         | 4.2(4)     |      |                 |            |      |                 |            |           |                 |            |    |         |        |
| 5   | 2-12.5     | 1-3        | 3    | 0.110               | 13.6           | -8(3)        | 1       | 1.71(1)         | 4(1)       | 5       | 1.98(1)         | 4(1)       |      |                 |            |      |                 |            |           |                 |            |    |         |        |
| 6   | 2-12.5     | 1-3        | 4    | 0.042               | 5.8            | -5(2)        | 1       | 1.71(1)         | 3.4(4)     | 4       | 1.99(1)         | 3.4(4)     | 5    | 2.84(2)         | 3.4(4)     | 3    | 2.97(2)         | 3.4(4)     | 2         | 3.09(2)         | 3.4(4)     | 14 | 3.23(2) | 3.4(4) |
| 7   | 2-12.5     | 1-3        | 4    | 0.087               | 11.8           | -6(2)        | -       | -               | -          | 5       | 2.00(1)         | 4(1)       | 5    | 2.84(3)         | 4(1)       | 3    | 2.97(3)         | 4(1)       | 2         | 3.09(3)         | 4(1)       | 14 | 3.23(3) | 4(1)   |
| 8   | 2-12.5     | 1-3        | 4    | 0.024               | 3.3            | -6(1)        | 1       | 1.72(1)         | 4.4(3)     | 5       | 1.99(1)         | 4.4(3)     | 5    | 2.84(1)         | 4.4(3)     | 3    | 2.97(1)         | 4.4(3)     | 2         | 3.09(1)         | 4.4(3)     | 14 | 3.22(1) | 4.4(3) |

\*Although EXAFS can not differentiate between O/N/C scattering paths, chemical intuition was used for description to facilitate comparison

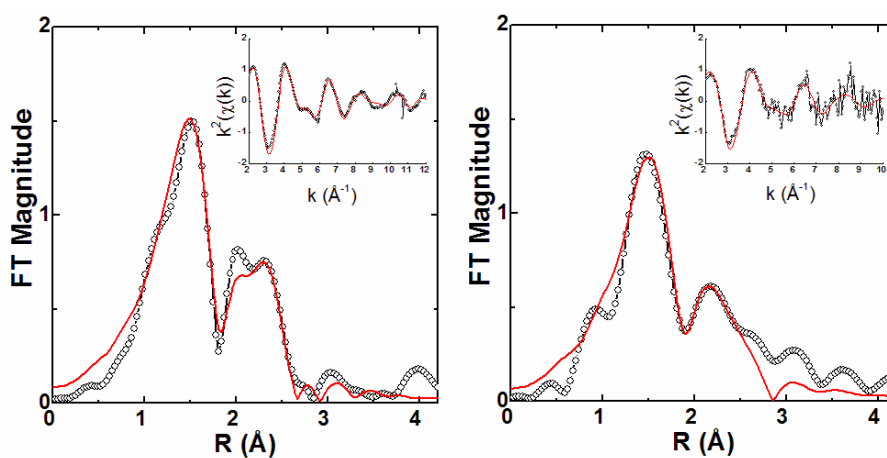

**Figure S13:** Non-phase shift corrected Fourier transforms for  $\mathbf{1}^{(III)} = \text{NHTs}$  (left) and  $\mathbf{2}^{(III)} = \text{NHTs}$  (right) with insets showing the  $k$ -space data and fits. Experimental data are shown in black and fits in red.

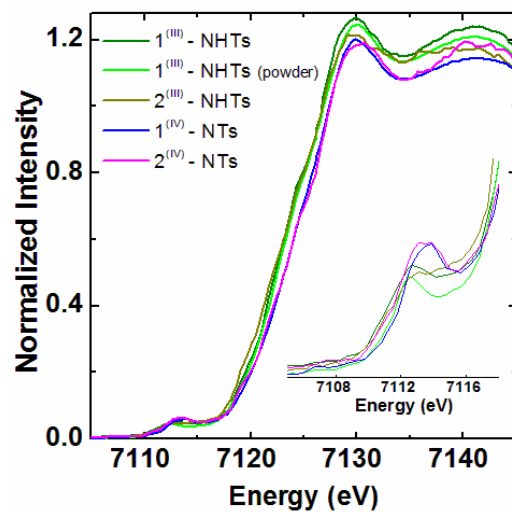

Figure S14: XANES spectra with inset showing 1s→ 3d features.

**Table S8:** Spectroscopic parameters from Fe-K edge X-ray absorption spectroscopy.

|                               | 1s→3d<br>area<br>(x10 <sup>2</sup> ) | 1s→3d<br>(eV) | E <sub>0</sub> '<br>(eV) | Fe-N<br>(Å) |
|-------------------------------|--------------------------------------|---------------|--------------------------|-------------|
| <b>1<sup>(IV)</sup>=NTs</b>   | 18.5                                 | 7113.2        | 7123.4                   | 1.73        |
| <b>2<sup>(IV)</sup>=NTs</b>   | 18.0                                 | 7113.3        | 7123.3                   | 1.72        |
| <b>1<sup>(III)</sup>=NHTs</b> | 12.4                                 | 7112.5        | 7122.5                   | 1.84        |
| <b>2<sup>(III)</sup>=NHTs</b> | 10.5                                 | 7112.4        | 7122.3                   | 1.84        |

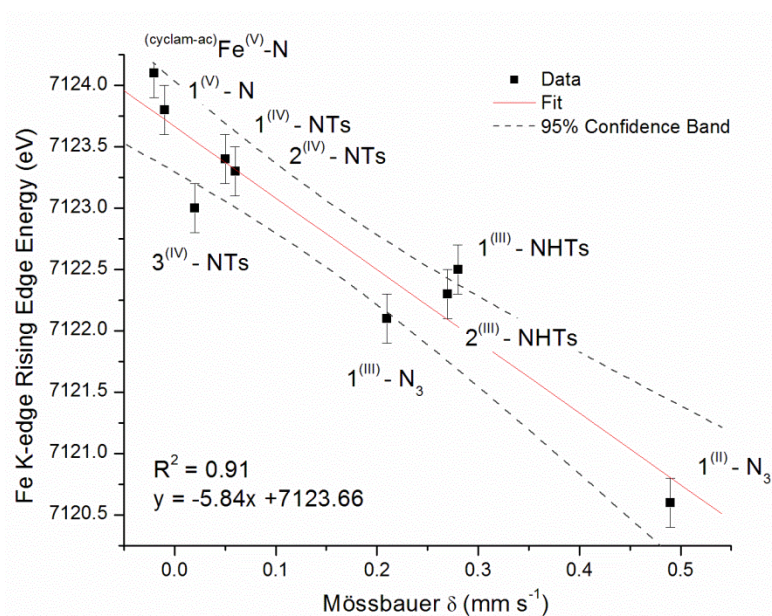

**Figure S15:** Correlation of Mössbauer and Fe K-edge rising edge energies for a series of related Fe-N<sup>x</sup> complexes. (Data for complexes **1<sup>(III)</sup>-N<sub>3</sub>** and **1<sup>(IV)</sup>-N<sub>3</sub>** was extracted from Sabenya et al.<sup>6,10</sup>, and for complexes **3<sup>(IV)</sup>-NTs** and (cyclam-ac)Fe<sup>(V)</sup>-N from Klinker et al,<sup>8</sup> and Aliaga-Alcalde et al.<sup>11</sup> respectively.

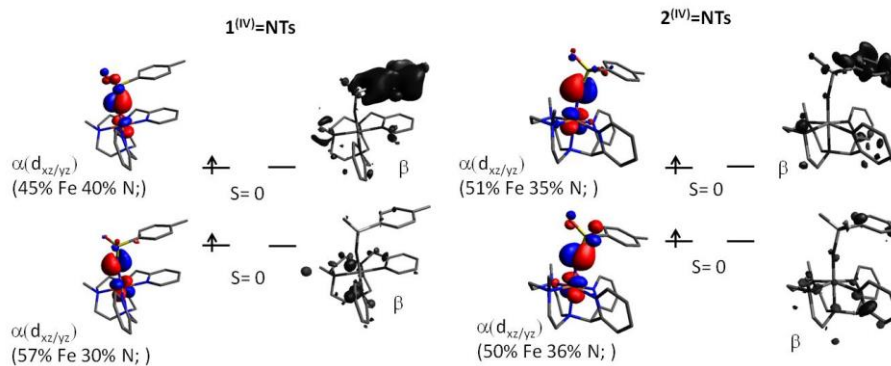

**Figure S16:** Schematic of Fe=NTs molecular orbitals showing the Fe d-manifold using unrestricted corresponding orbitals (0.05 isovalue) for  $1^{(IV)}=NTs$  (left) and  $2^{(IV)}=NTs$  (right).

## 5. Computational details

The geometries of the Fe(III) and Fe(IV) structures were optimized at the DFT level B3LYP and 6-311G\*\* 6d basis set for all atoms using the Gaussian09 program.<sup>12</sup> The solvation effect of acetonitrile was introduced in geometry optimizations and energy through the IEFPCM-SMD polarizable continuum model.<sup>13</sup> Dispersion effects were also included using the Grimme D<sub>3</sub> correction.<sup>14</sup> Stationary points were characterized by analytical frequency calculations. Electronic energies have been corrected using a B3LYP and cc-pVTZ 6d basis set for all atoms.

$$G = E^{cc-pVTZ} + G_{correction}^{6-311g**} \quad (1)$$

**Calculation of bond dissociation energy, pka and redox values.** Bond dissociation energy (enthalpy, 0 K gas-phase BDEs) is defined as the enthalpy change of the dissociation reaction of homolytic bonds at 298.15 K, 1 atm.<sup>15</sup>

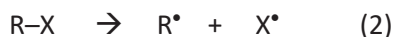

$$BDE(R-X) = H(R^{\bullet}) + H(X^{\bullet}) - H(R-X) \quad (3)$$

where  $H(R^{\bullet})$  and  $H(X^{\bullet})$  and  $H(R-X)$  are enthalpies of the radicals and the molecule.

The standard dissociation free energy change between an acid (AH) and its conjugate base (A<sup>-</sup>) in aqueous ( $\Delta G^*$ ) may be expressed as:<sup>[8]</sup>

$$\Delta G^* = G(A_{\text{aq}}^-) + G(H_{\text{aq}}^+) - G(AH_{\text{aq}}) + \Delta G^{o/*} \quad (3)$$

$$G(H_{\text{aq}}^+) = G(H_{\text{gas}}^+) + \Delta G_{\text{solv}}^{\text{H}^+} \quad (4)$$

where  $G(AH_{\text{aq}})$  and  $G(A_{\text{aq}}^-)$  are standard free energies of the acid and its conjugate base in aqueous media, respectively. The  $G(H_{\text{aq}}^+)$  is the free energy of the proton in acetonitrile, obtained from the experimental solvation free energy ( $\Delta G_{\text{solv}}^{\text{H}^+} = -260.2 \text{ kcal} \cdot \text{mol}^{-1}$ ) and its gas-phase free energy ( $G(H_{\text{gas}}^+) = -6.3 \text{ kcal} \cdot \text{mol}^{-1}$ ).  $\Delta G^{o/*}$  is the free energy change associated with the conversion from a standard state of 1 M in the aqueous phase and 1 atm in gas phase, to the desired concentration in both phases.  $\Delta G^*$  values are derived with the following expression:

$$\Delta G^{o/*} = RT \ln(24.4 * c) \quad (5)$$

where  $R$  is the universal gas constant ( $1.987 \text{ cal} \cdot \text{mol}^{-1} \cdot \text{K}^{-1}$ ),  $T$  is the temperature in Kelvin and  $c$  the concentration in  $\text{mol} \cdot \text{L}^{-1}$ .

The standard one electron redox potentials relative to the SHE electrode were calculated by:

$$E^o = -\frac{\Delta G^o - \Delta G_{\text{SHE}}}{F} \quad (6)$$

where  $\Delta G^o$  is the standard free energy change associated with the reduction reaction,  $F$  is the Faraday constant ( $23.061 \text{ kcal} \cdot \text{mol}^{-1} \cdot \text{V}^{-1}$ ) and  $\Delta G_{\text{SHE}}$  is the free energy change associated with the proton reduction to  $\text{H}_2$  ( $-4.24 \text{ eV}$ ). The  $\Delta G_{\text{SHE}}$  value was derived using the Fermi-Dirac statistics for the treatment of electron thermodynamics.

**Property calculations and electronic structure:** The electronic structure and Mössbauer parameters were explored with the ORCA software package.<sup>16</sup> Single point calculations on the above

optimized geometries were carried out using the B3LYP functional with a def2 – TZVP as well as a def2 – TZVP/J auxiliary basis set on all atoms.<sup>17, 18</sup> The calculations employed a dense integration grid (ORCA Grid 5 = Lebedev 434 points) along with the Grimme and coworkers DFT – D3BJ dispersion correction.<sup>14, 19</sup> In addition solvent effects were included using a conductor like screening model (COSMO) using acetonitrile as solvent.<sup>20</sup> Mössbauer parameters were also calculated, but in order to allow comparison with previously calibrated approaches the B3LYP functional was employed together with expanded CP(PPP) basis set<sup>21</sup> on the iron, TZVP basis set on the remaining atoms and a COSMO model simulating an aqueous solution environment.<sup>22</sup> As such, the calculated isotropic shift was adjusted to a linear calibration line of the form  $A(p-C) + B$  where A is -0.366, B is 2.852 and C is 11810 and p is the electron density at the nucleus.<sup>21, 22</sup> Quadrupole splittings were taken from theoretical calculations as is. Similarly calculated vibrational frequencies were reported without further scaling.

**Table S9.** Energies calculated for the different species of Fe<sup>III</sup>-NTs and Fe<sup>IV</sup>-NTs.

| Entry | Name           | E <sup>a</sup> | H <sup>b</sup> | G <sup>c</sup> |
|-------|----------------|----------------|----------------|----------------|
| 1     | 1NTs(III)d     | -3152.763272   | -3152.144742   | -3152.237112   |
| 2     | 1NTs(III)q     | -3152.763679   | -3152.145179   | -3152.240579   |
| 3     | 1NTs(III)sext  | -3152.774364   | -3152.157374   | -3152.255594   |
| 4     | 1NHTs(III)d    | -3153.250327   | -3152.617377   | -3152.710737   |
| 5     | 1NHTs(III)q    | -3153.239081   | -3152.606241   | -3152.701961   |
| 6     | 1NHTs(III)sext | -3153.25003    | -3152.61953    | -3152.71604    |
| 7     | 1NTs(IV)t      | -3152.594317   | -3151.974231   | -3152.067744   |
| 8     | 1NTs(IV)q      | -3152.58198    | -3151.963276   | -3152.059548   |
| 9     | 2NTs(III)d     | -3152.743342   | -3152.124508   | -3152.215807   |
| 10    | 2NTs(III)q     | -3152.749719   | -3152.132559   | -3152.227756   |
| 11    | 2NTs(III)sext  | -3152.762106   | -3152.145213   | -3152.242067   |
| 12    | 2NHTs(III)d    | -3153.236299   | -3152.603283   | -3152.694389   |
| 13    | 2NHTs(III)q    | -3153.22501    | -3152.593712   | -3152.689552   |
| 14    | 2NHTs(III)sext | -3153.237014   | -3152.607055   | -3152.706353   |
| 15    | 2NTs(IV)t      | -3152.578261   | -3151.957805   | -3152.050469   |
| 16    | 2NTs(IV)q      | -3152.563488   | -3151.945098   | -3152.040315   |

<sup>[a]</sup> Electronic energies calculated at B3LYP/6-311+g\*\*//B3LYP/cc-pVTZ level including solvent effects (SMD) and Grimme-D<sub>3</sub> dispersion correction. <sup>[b]</sup> Enthalpy energies (H) calculated as  $H = E^{cc-pVTZ} + H_{correction}^{6-311g^{**}}$ . <sup>[c]</sup> Gibbs energies (G) obtained as  $G = E^{cc-pVTZ} + G_{correction}^{6-311g^{**}}$ . All energies are given in hartrees.

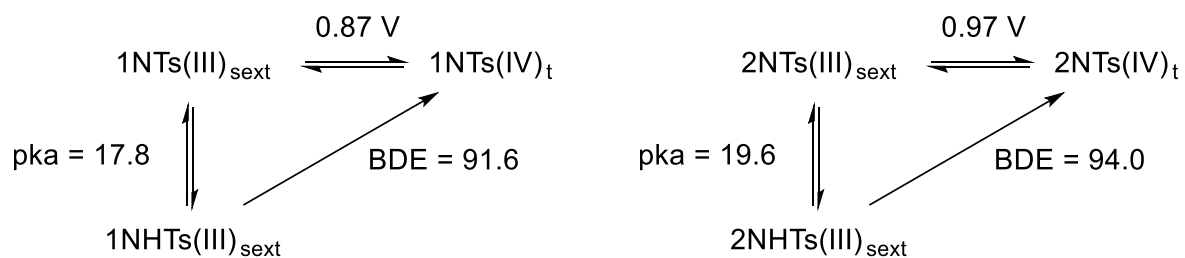

**Scheme S1.** Calculated  $E_{1/2}$  ( $\text{Fe}^{\text{III/IV}}$ ),  $\text{pK}_a$  of  $\text{Fe}^{\text{III}}$  protonation and BDE values for the protonation of **1** and **2** complexes. Theoretical values are calculated at B3LYP/6-311g\*\*//B3LYP/cc-pVTZ level including solvent effects (SMD) and Grimme-D<sub>3</sub> dispersion correction. All redox potentials are given in V vs SHE. BDE in  $\text{kcal mol}^{-1}$ .



**Table S9.** Energies calculated for the different species of Fe<sup>III</sup>-O and Fe<sup>IV</sup> = O.

| Entry | Name                | E <sup>a</sup> | H <sup>b</sup> | G <sup>c</sup> |
|-------|---------------------|----------------|----------------|----------------|
| 1     | <b>1O(III)d</b>     | -2353.42267    | -2352.94451    | -2353.01383    |
| 2     | <b>1O(III)q</b>     | -2353.44761    | -2352.97006    | -2353.04313    |
| 3     | <b>1O(III)sext</b>  | -2353.44745    | -2352.97063    | -2353.04561    |
| 4     | <b>1OH(III)d</b>    | -2353.94547    | -2353.45318    | -2353.52335    |
| 5     | <b>1OH(III)q</b>    | -2353.93040    | -2353.43972    | -2353.51292    |
| 6     | <b>1OH(III)sext</b> | -2353.94242    | -2353.45242    | -2353.52692    |
| 7     | <b>1O(IV)t</b>      | -2353.29939    | -2352.81820    | -2352.88671    |
| 8     | <b>2O(III)d</b>     | -2353.40471    | -2352.92689    | -2352.99627    |
| 9     | <b>2O(III)q</b>     | -2353.43432    | -2352.95758    | -2353.03178    |
| 10    | <b>2O(III)sext</b>  | -2353.43510    | -2352.95865    | -2353.03420    |
| 11    | <b>2OH(III)d</b>    | -2353.93096    | -2353.43871    | -2353.50779    |
| 12    | <b>2OH(III)q</b>    | -2353.91351    | -2353.42333    | -2353.49734    |
| 13    | <b>2OH(III)sext</b> | -2353.92688    | -2353.43779    | -2353.51434    |
| 14    | <b>2O(IV)t</b>      | -2353.28366    | -2352.80274    | -2352.87132    |

<sup>[a]</sup> Electronic energies calculated at B3LYP/6-311+g\*\*//B3LYP/cc-pVTZ level including solvent effects (SMD) and Grimme-D<sub>3</sub> dispersion correction. <sup>[b]</sup> Enthalpy energies (H) calculated as  $H = E^{cc-pVTZ} + H_{correction}^{6-311g^{**}}$ . <sup>[c]</sup> Gibbs energies (G) obtained as  $G = E^{cc-pVTZ} + G_{correction}^{6-311g^{**}}$ . All energies are given in hartrees.

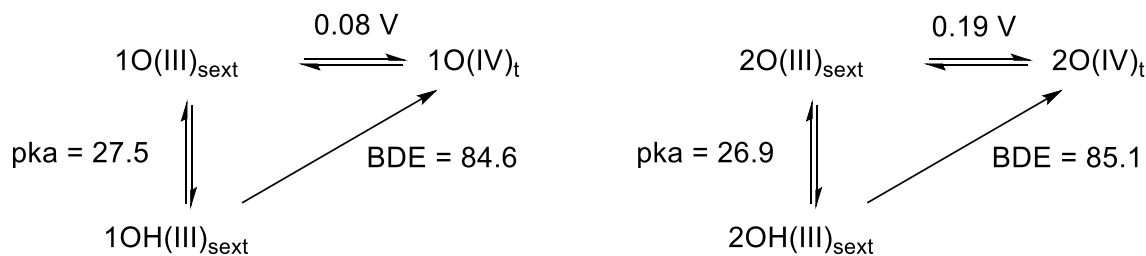

**Scheme S2.** Calculated  $E_{1/2}$  (Fe<sup>III/IV</sup>), pKa of Fe<sup>III</sup> protonation and BDE values for the protonation of **1** and **2** oxo- analogues. Theoretical values are calculated at B3LYP/6-311g\*\*//B3LYP/cc-pVTZ level including solvent effects (SMD) and Grimme-D<sub>3</sub> dispersion correction. All redox potentials are given in V vs SHE. BDE in kcal mol<sup>-1</sup>.

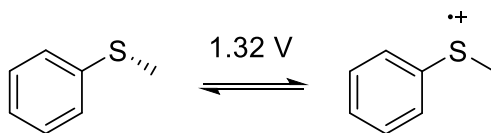

**Scheme S3.** Calculated  $E_{1/2}$  (PhSMe<sup>0/+</sup>). Theoretical values are calculated at B3LYP/6-311g\*\*//B3LYP/cc-pVTZ level including solvent effects (SMD) and Grimme-D<sub>3</sub> dispersion correction. All redox potentials are given in V vs SHE. BDE in kcal mol<sup>-1</sup>.

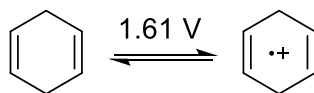

**Scheme S4.** Calculated  $E_{1/2}$  ( $\text{CHD}^{+/0}$ ). Theoretical values are calculated at B3LYP/cc-pVTZ level including solvent effects (SMD) and Grimme-D<sub>3</sub> dispersion correction. All redox potentials are given in V vs SHE.

## 6. Cartesian Coordinates

### 1NTs(III)d

E = -3152.763272

G = -3152.237112

1,2

N +2.06052 +1.49886 -0.01615  
N +2.51817 -0.74542 -1.37913  
N +2.28931 -1.16756 +1.36932  
N +0.31646 -2.08254 -0.38060  
N -0.27265 +0.29365 -1.43323  
C +2.02652 +2.45513 +0.92715  
H +1.34391 +2.29233 +1.74469  
C +2.83023 +3.58388 +0.86840  
H +2.76548 +4.32536 +1.65424  
C +3.70922 +3.73114 -0.20003  
H +4.35334 +4.59947 -0.27090  
C +3.76124 +2.73461 -1.16909  
H +4.44380 +2.79685 -2.00710  
C +2.92534 +1.63265 -1.04872  
C +2.89354 +0.51825 -2.05732  
H +3.84850 +0.42841 -2.58066  
H +2.12972 +0.74412 -2.80311  
C +3.68922 -1.35962 -0.66392  
H +4.62178 -1.01085 -1.11083  
H +3.65284 -2.43648 -0.80953  
C +3.66669 -1.02496 +0.81972  
H +4.36767 -1.67089 +1.35920  
H +3.96903 +0.00781 +0.98355  
C +2.25477 -0.58186 +2.73038  
H +2.96615 -1.10273 +3.38019  
H +1.24458 -0.66407 +3.12048  
H +2.52019 +0.47197 +2.67927  
C +1.87057 -2.61654 +1.44028  
H +1.92574 -2.96541 +2.47276  
H +2.57746 -3.21681 +0.87097  
C +0.45331 -2.80257 +0.91518  
H +0.22023 -3.86608 +0.80241  
H -0.25657 -2.34226 +1.59857  
C +1.10031 -2.74598 -1.48726  
H +0.42009 -3.29871 -2.13669  
H +1.77389 -3.47457 -1.04382  
C +1.87928 -1.72033 -2.30459  
H +2.62607 -2.21963 -2.92929  
H +1.20955 -1.16767 -2.95877  
C -1.09437 -1.87944 -0.78952  
H -1.66898 -1.65433 +0.10907  
H -1.51185 -2.77168 -1.26146  
C -1.17346 -0.68208 -1.69409

C -2.13220 -0.54644 -2.68857  
H -2.82487 -1.35732 -2.87440  
C -2.18873 +0.63821 -3.41444  
H -2.92917 +0.76809 -4.19465  
C -1.28895 +1.65625 -3.11335  
H -1.30726 +2.60137 -3.64026  
C -0.34944 +1.44757 -2.11452  
H +0.35748 +2.21475 -1.84016  
Fe +1.03531 -0.22794 -0.00234  
N -0.18980 +0.12450 +1.33022  
S -1.19464 +1.33541 +1.46148  
O -1.32480 +1.74023 +2.89580  
O -0.98862 +2.49924 +0.54294  
C -2.82391 +0.66933 +1.02051  
C -3.53180 +1.19250 -0.05520  
C -3.35335 -0.39574 +1.75540  
C -4.76898 +0.64691 -0.40173  
H -3.11049 +2.01486 -0.61890  
C -4.58368 -0.93408 +1.39979  
H -2.80268 -0.80237 +2.59534  
C -5.31151 -0.42461 +0.31221  
H -5.31438 +1.05866 -1.24480  
H -4.99100 -1.76158 +1.97219  
C -6.63214 -1.03816 -0.07832  
H -7.18614 -0.39254 -0.76304  
H -6.48087 -2.00160 -0.57757  
H -7.25708 -1.22612 +0.79925

### 1NTs(III)q

E = -3152.763679

G = -3152.240579

1,4

N +2.15703 +0.61938 -1.56525  
N +2.47685 -1.44652 +0.19006  
N +2.26896 +0.94219 +1.72654  
N +0.30573 -1.15243 +1.96087  
N -0.44884 -1.15407 -0.67599  
C +2.20016 +1.81482 -2.16774  
H +1.48336 +2.54233 -1.81485  
C +3.10644 +2.10000 -3.18100  
H +3.11098 +3.07913 -3.64275  
C +4.00103 +1.10807 -3.57440  
H +4.72723 +1.29941 -4.35568  
C +3.95946 -0.13298 -2.94386  
H +4.64498 -0.92602 -3.21550  
C +3.01872 -0.34290 -1.94283  
C +2.85227 -1.65948 -1.23066

H +3.75510 -2.27076 -1.31145  
H +2.03773 -2.20367 -1.71346  
C +3.65938 -0.98760 +1.00117  
H +4.58411 -1.22984 +0.47349  
H +3.67579 -1.55004 +1.93179  
C +3.61959 +0.50783 +1.28876  
H +4.37384 +0.75350 +2.04632  
H +3.85512 +1.07206 +0.38772  
C +2.20151 +2.41810 +1.74388  
H +2.95427 +2.82905 +2.42681  
H +1.20581 +2.72392 +2.05620  
H +2.37103 +2.79655 +0.73675  
C +1.89520 +0.38751 +3.06844  
H +1.95690 +1.17524 +3.82239  
H +2.62212 -0.37075 +3.35312  
C +0.48202 -0.19611 +3.07577  
H +0.28494 -0.66270 +4.04854  
H -0.23996 +0.60625 +2.92201  
C +1.13766 -2.38068 +2.07414  
H +0.51245 -3.23954 +2.33301  
H +1.84529 -2.25496 +2.89065  
C +1.87297 -2.68223 +0.76451  
H +2.64127 -3.44427 +0.93209  
H +1.17274 -3.07037 +0.02787  
C -1.09918 -1.45367 +1.64329  
H -1.68632 -0.55035 +1.81502  
H -1.50442 -2.24769 +2.27813  
C -1.25044 -1.81640 +0.18389  
C -2.17617 -2.74709 -0.26871  
H -2.79864 -3.27046 +0.44590  
C -2.28555 -2.98433 -1.63536  
H -3.00248 -3.70626 -2.00818  
C -1.46778 -2.28108 -2.51520  
H -1.52482 -2.43194 -3.58534  
C -0.56046 -1.37044 -1.99505  
H +0.09169 -0.78459 -2.62694  
Fe +0.92898 +0.11336 +0.18882  
N -0.16919 +1.54522 +0.21612  
S -1.28256 +1.99805 -0.82196  
O -1.56826 +3.44105 -0.59117  
O -1.00240 +1.64118 -2.24116  
C -2.82228 +1.14141 -0.40232  
C -3.51622 +0.42079 -1.36784  
C -3.31881 +1.23250 +0.89978  
C -4.70231 -0.22737 -1.02403  
H -3.12091 +0.35817 -2.37303  
C -4.49977 +0.57965 +1.23171  
H -2.77851 +1.79639 +1.65116  
C -5.20938 -0.16495 +0.27709  
H -5.23435 -0.79775 -1.77836  
H -4.87951 +0.64550 +2.24620  
C -6.46427 -0.90587 +0.66241  
H -7.08328 -1.12634 -0.21001

H -6.21568 -1.85962 +1.14145  
H -7.06186 -0.33146 +1.37498

### 1NTs(III)sext

E = -3152.774364

G = -3152.255594

1,6

N -1.94700 +1.29518 +0.91871  
N -2.52850 -1.38862 +0.84018  
N -2.52337 -0.46261 -1.88972  
N -0.44130 -2.18114 -0.93769  
N +0.53841 -0.73784 +1.14126  
C -1.81735 +2.61748 +0.70869  
H -1.09957 +2.90544 -0.05080  
C -2.54960 +3.54745 +1.43143  
H -2.42228 +4.60448 +1.23610  
C -3.44447 +3.08876 +2.39600  
H -4.03958 +3.78914 +2.97030  
C -3.56995 +1.72003 +2.61443  
H -4.25519 +1.32889 +3.35608  
C -2.79773 +0.84392 +1.85989  
C -2.80219 -0.64939 +2.08773  
H -3.74179 -0.96382 +2.55217  
H -1.99872 -0.86851 +2.79533  
C -3.75249 -1.54368 -0.00101  
H -4.64880 -1.42380 +0.61288  
H -3.77772 -2.56004 -0.38915  
C -3.80665 -0.53748 -1.14777  
H -4.63151 -0.79880 -1.82171  
H -3.99914 +0.46230 -0.75692  
C -2.53962 +0.69911 -2.80566  
H -3.36644 +0.61917 -3.52145  
H -1.59134 +0.74698 -3.33584  
H -2.64857 +1.61371 -2.22210  
C -2.20119 -1.72066 -2.63319  
H -2.34570 -1.56644 -3.70475  
H -2.89982 -2.50032 -2.33700  
C -0.75730 -2.16493 -2.39038  
H -0.58970 -3.14839 -2.84393  
H -0.07664 -1.44802 -2.84925  
C -1.20050 -3.22851 -0.18595  
H -0.53269 -4.05030 +0.08385  
H -1.95640 -3.64569 -0.84785  
C -1.85715 -2.68687 +1.08935  
H -2.56227 -3.43410 +1.47279  
H -1.10139 -2.52107 +1.85349  
C +1.01352 -2.25470 -0.67856  
H +1.51100 -1.60285 -1.40003  
H +1.39575 -3.27124 -0.80885  
C +1.33395 -1.72899 +0.70013  
C +2.40293 -2.19434 +1.45776  
H +3.02263 -2.99675 +1.07779  
C +2.65367 -1.61262 +2.69667

H +3.48182 -1.95778 +3.30411  
C +1.82987 -0.58291 +3.14404  
H +1.99366 -0.10153 +4.09952  
C +0.78214 -0.17326 +2.33173  
H +0.11073 +0.62333 +2.62802  
Fe -0.96782 -0.12597 -0.34094  
N +0.18537 +0.86727 -1.31948  
S +1.28792 +1.91256 -1.66486  
O +1.57609 +1.98879 -3.12412  
O +1.03592 +3.23825 -1.02503  
C +2.79036 +1.26485 -0.89412  
C +3.13079 +1.65346 +0.39889  
C +3.54980 +0.30343 -1.56234  
C +4.23587 +1.07801 +1.02160  
H +2.53792 +2.40326 +0.90790  
C +4.64970 -0.26585 -0.92851  
H +3.28428 +0.01204 -2.57137  
C +5.00656 +0.10605 +0.37483  
H +4.49620 +1.38177 +2.02994  
H +5.23837 -1.01339 -1.45068  
C +6.16179 -0.56043 +1.07572  
H +6.52941 +0.04565 +1.90658  
H +5.85266 -1.52920 +1.48446  
H +6.99153 -0.74790 +0.38933

#### 1NHTs(III)d

E = -3153.250327

G = -3152.710737

2,2

N +2.29567 +1.10321 +0.85393  
N +2.52286 +0.25510 -1.64500  
N +2.14438 -1.83096 +0.13234  
N +0.16551 -1.14859 -1.67477  
N -0.09522 +1.38575 -0.87746  
C +2.30657 +1.23514 +2.19306  
H +1.57128 +0.65910 +2.73545  
C +3.20988 +2.05942 +2.84521  
H +3.17753 +2.13521 +3.92409  
C +4.14503 +2.76400 +2.09312  
H +4.86859 +3.40967 +2.57581  
C +4.14390 +2.62012 +0.70990  
H +4.85939 +3.14059 +0.08638  
C +3.20559 +1.78520 +0.12084  
C +3.08002 +1.60724 -1.36189  
H +4.03365 +1.75163 -1.87118  
H +2.38347 +2.35354 -1.74707  
C +3.60273 -0.80014 -1.57781  
H +4.57747 -0.33483 -1.72352  
H +3.45476 -1.49469 -2.40006  
C +3.55836 -1.51828 -0.24469  
H +4.14613 -2.43933 -0.28758  
H +3.96724 -0.89269 +0.54627  
C +2.14470 -2.28028 +1.55271

H +2.86485 -3.09545 +1.66982  
H +1.15379 -2.62657 +1.82149  
H +2.43166 -1.45285 +2.19666  
C +1.57307 -2.92667 -0.74721  
H +1.54818 -3.86231 -0.18868  
H +2.24108 -3.07824 -1.59163  
C +0.17055 -2.56999 -1.21599  
H -0.14699 -3.23420 -2.02432  
H -0.53034 -2.65662 -0.39195  
C +0.90855 -1.00071 -2.98842  
H +0.18927 -0.91697 -3.80298  
H +1.48015 -1.90829 -3.15734  
C +1.81592 +0.21651 -2.96271  
H +2.53867 +0.17941 -3.78109  
H +1.23874 +1.13273 -3.05773  
C -1.19845 -0.56904 -1.78530  
H -1.81093 -0.97412 -0.98160  
H -1.66989 -0.84227 -2.73054  
C -1.13284 +0.92235 -1.61123  
C -2.11531 +1.77286 -2.09874  
H -2.92586 +1.36479 -2.68866  
C -2.04464 +3.12859 -1.80099  
H -2.80375 +3.80919 -2.16705  
C -0.99208 +3.59524 -1.01807  
H -0.90413 +4.63995 -0.75075  
C -0.03641 +2.69466 -0.57610  
H +0.79216 +3.01706 +0.03766  
Fe +1.10007 -0.11458 -0.23259  
N -0.15765 -0.22688 +1.23051  
S -1.27736 -1.13116 +2.00186  
O -1.04706 -2.55921 +1.72008  
O -1.32592 -0.70852 +3.41311  
C -2.86442 -0.70098 +1.26681  
C -3.22610 +0.64403 +1.16198  
C -3.70298 -1.70656 +0.79685  
C -4.43729 +0.97357 +0.57027  
H -2.56783 +1.42907 +1.51567  
C -4.91670 -1.35665 +0.20613  
H -3.40529 -2.74428 +0.87646  
C -5.30022 -0.01834 +0.07963  
H -4.71463 +2.01777 +0.47463  
H -5.56973 -2.13860 -0.16558  
C -6.60332 +0.36576 -0.57055  
H -7.23413 +0.92750 +0.12531  
H -6.42950 +1.00977 -1.43826  
H -7.15937 -0.51271 -0.90268  
H -0.30953 +0.72198 +1.56991

#### 1NHTs(III)q

E = -3153.239081

G = -3152.701961

2,4

N +2.39600 +1.18242 +0.72919

N +2.27916 -0.14354 -1.63381  
 N +1.98371 -2.02092 +0.44953  
 N -0.04739 -1.70684 -1.57803  
 N -0.50462 +0.90910 -0.95591  
 C +2.63044 +1.51944 +2.00657  
 H +1.97155 +1.07779 +2.74291  
 C +3.66352 +2.37426 +2.36402  
 H +3.82184 +2.62301 +3.40536  
 C +4.48378 +2.88577 +1.36136  
 H +5.30516 +3.54803 +1.60775  
 C +4.24608 +2.52671 +0.03734  
 H +4.87034 +2.89377 -0.76734  
 C +3.18716 +1.67286 -0.24205  
 C +2.80889 +1.25062 -1.63325  
 H +3.65212 +1.33308 -2.32186  
 H +2.01468 +1.90972 -1.98984  
 C +3.38895 -1.14628 -1.40896  
 H +4.35009 -0.67316 -1.61210  
 H +3.27068 -1.95122 -2.12901  
 C +3.37535 -1.69183 +0.00788  
 H +4.00216 -2.58651 +0.07028  
 H +3.76479 -0.95810 +0.70940  
 C +2.00625 -2.29811 +1.91070  
 H +2.73760 -3.08493 +2.11889  
 H +1.01751 -2.61194 +2.22824  
 H +2.27986 -1.38873 +2.44129  
 C +1.43496 -3.21824 -0.29681  
 H +1.42344 -4.07606 +0.37634  
 H +2.11789 -3.46297 -1.10706  
 C +0.02392 -2.98190 -0.82298  
 H -0.28131 -3.83384 -1.44052  
 H -0.66315 -2.89382 +0.01873  
 C +0.74144 -1.68316 -2.83755  
 H +0.07645 -1.73237 -3.70243  
 H +1.37722 -2.56426 -2.88068  
 C +1.57231 -0.40723 -2.92462  
 H +2.30106 -0.47832 -3.73678  
 H +0.92842 +0.44727 -3.12049  
 C -1.41899 -1.19848 -1.76564  
 H -2.03858 -1.56977 -0.94844  
 H -1.85997 -1.55293 -2.70070  
 C -1.45358 +0.30875 -1.70409  
 C -2.44265 +1.05625 -2.33236  
 H -3.18632 +0.54915 -2.93361  
 C -2.46115 +2.43547 -2.17020  
 H -3.22822 +3.03076 -2.65038  
 C -1.48696 +3.04147 -1.38011  
 H -1.46721 +4.11150 -1.22229  
 C -0.52400 +2.24422 -0.78733  
 H +0.25736 +2.65730 -0.16253  
 Fe +0.87249 -0.28480 -0.03058  
 N -0.05418 -0.02944 +1.65143  
 S -1.29788 -0.75019 +2.44970

O -1.16968 -2.20909 +2.30824  
 O -1.35228 -0.17718 +3.80428  
 C -2.80040 -0.26427 +1.58903  
 C -3.09541 +1.09281 +1.44405  
 C -3.64248 -1.24044 +1.06773  
 C -4.23915 +1.46384 +0.75172  
 H -2.43879 +1.85303 +1.85031  
 C -4.78812 -0.84918 +0.37573  
 H -3.40106 -2.28851 +1.18970  
 C -5.10022 +0.50208 +0.20122  
 H -4.46421 +2.51678 +0.62333  
 H -5.44250 -1.60855 -0.03805  
 C -6.30897 +0.93052 -0.58784  
 H -6.86345 +1.71529 -0.06613  
 H -6.00529 +1.34074 -1.55724  
 H -6.98450 +0.09346 -0.77394  
 H -0.15990 +0.97509 +1.80849

**1NHts(III)sext**

E = -3153.25003

G = -3152.71604

2,6

N +2.36079 +0.98303 +1.07921  
 N +2.46554 +0.42684 -1.55271  
 N +2.17346 -2.05431 -0.12260  
 N +0.16585 -1.15264 -1.92718  
 N -0.41633 +1.22280 -0.76234  
 C +2.50733 +0.93278 +2.41735  
 H +1.84842 +0.25631 +2.94332  
 C +3.45543 +1.68989 +3.08524  
 H +3.53810 +1.61729 +4.16184  
 C +4.28915 +2.52307 +2.34346  
 H +5.04436 +3.12494 +2.83482  
 C +4.15303 +2.55925 +0.96007  
 H +4.79699 +3.17679 +0.34707  
 C +3.17886 +1.77376 +0.35682  
 C +2.94622 +1.75967 -1.12698  
 H +3.85037 +2.05125 -1.66805  
 H +2.16892 +2.49117 -1.35856  
 C +3.57720 -0.58545 -1.58308  
 H +4.54153 -0.07427 -1.59651  
 H +3.50414 -1.14055 -2.51576  
 C +3.54635 -1.54284 -0.39392  
 H +4.22506 -2.38052 -0.58424  
 H +3.88177 -1.03966 +0.51121  
 C +2.13123 -2.73056 +1.19967  
 H +2.82791 -3.57460 +1.21237  
 H +1.11699 -3.07742 +1.38720  
 H +2.40778 -2.01720 +1.97482  
 C +1.67539 -2.97382 -1.20081  
 H +1.68489 -4.00201 -0.83620  
 H +2.35939 -2.93314 -2.04541  
 C +0.25752 -2.60581 -1.61935

H -0.05502 -3.21079 -2.47662  
 H -0.42336 -2.79506 -0.78701  
 C +0.95582 -0.74431 -3.12759  
 H +0.28171 -0.56748 -3.96785  
 H +1.60409 -1.56850 -3.41376  
 C +1.77259 +0.51514 -2.86431  
 H +2.49437 +0.66305 -3.67435  
 H +1.12334 +1.38719 -2.83407  
 C -1.23574 -0.68160 -1.99752  
 H -1.81462 -1.23294 -1.25488  
 H -1.67314 -0.88164 -2.97873  
 C -1.32795 +0.78035 -1.64747  
 C -2.32306 +1.61619 -2.13854  
 H -3.03890 +1.23448 -2.85496  
 C -2.38205 +2.92962 -1.68542  
 H -3.15251 +3.59763 -2.05102  
 C -1.44591 +3.37422 -0.75405  
 H -1.46280 +4.38676 -0.37295  
 C -0.47571 +2.48770 -0.31458  
 H +0.27711 +2.77501 +0.40871  
 Fe +0.93135 -0.27657 -0.00206  
 N -0.14499 -0.37414 +1.66489  
 S -1.39076 -1.30112 +2.18162  
 O -1.21129 -2.65676 +1.63299  
 O -1.54068 -1.15410 +3.63938  
 C -2.85169 -0.59683 +1.40050  
 C -3.13475 +0.75807 +1.58781  
 C -3.66034 -1.39241 +0.59739  
 C -4.23553 +1.31243 +0.95115  
 H -2.49759 +1.37842 +2.20709  
 C -4.76168 -0.81778 -0.03749  
 H -3.42364 -2.43935 +0.45698  
 C -5.06361 +0.53704 +0.12426  
 H -4.45053 +2.36732 +1.08255  
 H -5.38811 -1.43472 -0.67239  
 C -6.23330 +1.17109 -0.58165  
 H -6.91687 +1.63586 +0.13509  
 H -5.89196 +1.96014 -1.25943  
 H -6.79357 +0.43924 -1.16621  
 H -0.18337 +0.50772 +2.17616

**1NTs(IV)t**

E = -3152.594317

G = -3152.067744

2,3

N -1.31773 +1.21928 -0.69761  
 N -2.00360 -0.73890 +0.94259  
 N -1.46363 -1.63510 -1.62611  
 N +0.23095 -2.25430 +0.48521  
 N +0.75504 +0.26193 +1.17272  
 C -1.07629 +2.02522 -1.74760  
 H -0.27410 +1.73129 -2.40631  
 C -1.80975 +3.18091 -1.96762

H -1.57900 +3.79951 -2.82502  
 C -2.83010 +3.51435 -1.08272  
 H -3.42558 +4.40623 -1.23635  
 C -3.07974 +2.68194 +0.00330  
 H -3.86533 +2.89990 +0.71522  
 C -2.30199 +1.54639 +0.17363  
 C -2.43797 +0.62498 +1.34815  
 H -3.45591 +0.61254 +1.73971  
 H -1.78077 +0.97310 +2.14695  
 C -3.11273 -1.45117 +0.19608  
 H -4.06968 -1.00233 +0.46096  
 H -3.14097 -2.48351 +0.53426  
 C -2.89661 -1.37579 -1.30299  
 H -3.53694 -2.10007 -1.81436  
 H -3.13624 -0.38493 -1.68363  
 C -1.22141 -1.28315 -3.05139  
 H -1.91065 -1.84865 -3.68472  
 H -0.19437 -1.52541 -3.31093  
 H -1.38454 -0.21829 -3.19714  
 C -1.09404 -3.08759 -1.40203  
 H -1.02680 -3.59620 -2.36365  
 H -1.89318 -3.57080 -0.84563  
 C +0.23342 -3.20457 -0.66916  
 H +0.39629 -4.22861 -0.32343  
 H +1.05261 -2.91305 -1.32255  
 C -0.70704 -2.71210 +1.58496  
 H -0.12541 -3.15486 +2.39275  
 H -1.34397 -3.49498 +1.18349  
 C -1.53493 -1.54890 +2.10751  
 H -2.38570 -1.91052 +2.68989  
 H -0.93785 -0.90206 +2.74491  
 C +1.58983 -1.99915 +1.03615  
 H +2.29408 -1.97956 +0.20462  
 H +1.89150 -2.79177 +1.72148  
 C +1.60643 -0.65078 +1.69760  
 C +2.46382 -0.32573 +2.73807  
 H +3.12345 -1.08330 +3.14044  
 C +2.45916 +0.97170 +3.23835  
 H +3.11921 +1.24609 +4.05205  
 C +1.60834 +1.91328 +2.66866  
 H +1.58788 +2.93951 +3.01046  
 C +0.77476 +1.52401 +1.63307  
 H +0.11113 +2.22880 +1.15482  
 Fe -0.37056 -0.50714 -0.29533  
 N +0.94540 -0.34411 -1.41011  
 S +2.22468 +0.22649 -2.19674  
 O +2.67557 -0.82623 -3.12361  
 O +1.90933 +1.54661 -2.77699  
 C +3.50068 +0.46968 -0.96770  
 C +3.57639 +1.68929 -0.29513  
 C +4.38822 -0.56805 -0.68329  
 C +4.55601 +1.86343 +0.67367  
 H +2.88509 +2.48776 -0.53143

C +5.35961 -0.37551 +0.29317  
H +4.32590 -1.50469 -1.22290  
C +5.45532 +0.83599 +0.98938  
H +4.61889 +2.80896 +1.20057  
H +6.05430 -1.17770 +0.51603  
C +6.47395 +1.02388 +2.08129  
H +6.88407 +2.03673 +2.07176  
H +6.00830 +0.87132 +3.06148  
H +7.29643 +0.31165 +1.99046

#### 1NTs(IV)q

E = -3152.58198

G = -3152.059548

2,5

N +2.20890 +0.99733 -1.29404  
N +2.51488 -1.44012 -0.23346  
N +2.10708 +0.39914 +1.89786  
N +0.20911 -1.63272 +1.33140  
N -0.31641 -0.99304 -1.25108  
C +2.18685 +2.32347 -1.51882  
H +1.45482 +2.89238 -0.96574  
C +3.06849 +2.92836 -2.39871  
H +3.02040 +3.99786 -2.55492  
C +4.00624 +2.13737 -3.05890  
H +4.71207 +2.58362 -3.74899  
C +4.03854 +0.76779 -2.81375  
H +4.76187 +0.12320 -3.29597  
C +3.12240 +0.22648 -1.92389  
C +3.02773 -1.24085 -1.62164  
H +3.98666 -1.74422 -1.75315  
H +2.31819 -1.69228 -2.31790  
C +3.61778 -1.22724 +0.78762  
H +4.58339 -1.30098 +0.28779  
H +3.56653 -2.04213 +1.50457  
C +3.51092 +0.11779 +1.48874  
H +4.17382 +0.13074 +2.36002  
H +3.81663 +0.92369 +0.82289  
C +1.96777 +1.82236 +2.29047  
H +2.64770 +2.04969 +3.11752  
H +0.93934 +2.00708 +2.59354  
H +2.19995 +2.45780 +1.43744  
C +1.62721 -0.49568 +3.00254  
H +1.59114 +0.06685 +3.93657  
H +2.34510 -1.29992 +3.14863  
C +0.23932 -1.05255 +2.69922  
H -0.03537 -1.80090 +3.44894  
H -0.49547 -0.24804 +2.71887  
C +1.06479 -2.85807 +1.19012  
H +0.43416 -3.74847 +1.16325  
H +1.69703 -2.94547 +2.06956  
C +1.90600 -2.79964 -0.07973  
H +2.69357 -3.55741 -0.05247  
H +1.29179 -2.98555 -0.95705

C -1.16256 -1.87177 +0.83689  
H -1.80117 -1.06153 +1.19445  
H -1.56473 -2.81355 +1.21681  
C -1.18491 -1.84269 -0.66930  
C -2.07952 -2.58527 -1.42752  
H -2.75745 -3.26876 -0.93285  
C -2.09578 -2.41846 -2.80788  
H -2.78828 -2.98595 -3.41765  
C -1.21930 -1.50916 -3.39500  
H -1.20619 -1.34216 -4.46390  
C -0.34101 -0.81138 -2.58119  
H +0.36305 -0.09591 -2.98250  
Fe +1.00340 -0.01898 +0.07864  
N -0.16877 +1.20354 +0.36572  
S -1.31545 +2.09440 -0.38847  
O -1.31568 +3.40483 +0.28133  
O -1.13990 +2.06954 -1.84949  
C -2.83125 +1.24715 +0.02186  
C -3.48164 +0.48864 -0.94526  
C -3.30248 +1.31233 +1.33614  
C -4.62914 -0.21471 -0.58768  
H -3.09309 +0.44115 -1.95433  
C -4.44432 +0.60068 +1.67343  
H -2.78434 +1.90771 +2.07775  
C -5.12270 -0.17709 +0.72030  
H -5.14023 -0.80902 -1.33658  
H -4.81898 +0.64608 +2.69021  
C -6.34074 -0.96823 +1.11608  
H -6.88437 -1.33201 +0.24234  
H -6.05227 -1.83631 +1.71848  
H -7.02080 -0.36586 +1.72418

#### 2NTs(III)d

E = -3152.743342

G = -3152.215807

1,2

N +1.71143 -1.02733 -2.17484  
C +3.08646 -1.58132 -1.96367  
C +3.16794 -2.25802 -0.61652  
N +2.64999 -1.38726 +0.48098  
C +3.58378 -0.29373 +0.91308  
C +3.57888 +0.94649 +0.00589  
N +2.26742 +1.14601 -0.70680  
C +1.79398 +0.21349 -2.99211  
C +2.46034 +1.34222 -2.19212  
C +1.40196 +2.22619 -0.12307  
C +0.08130 +2.14074 -0.86443  
C +1.11346 +1.85488 +1.31032  
N +0.75006 +0.56099 +1.44899  
C +0.41385 +0.11126 +2.66813  
C +0.43665 +0.93953 +3.78444  
C +0.82266 +2.26772 +3.64166  
C +1.16663 +2.73732 +2.37574



N -0.31967 +0.86558 -1.05130  
 C -1.45210 +0.62688 -1.72416  
 C -2.24791 +1.65877 -2.20384  
 C -1.85083 +2.97487 -1.98674  
 C -0.65780 +3.22322 -1.30990  
 Fe +0.99941 -0.43574 -0.29304  
 C +0.86558 -2.02224 -2.87077  
 C +2.42359 -2.28008 +1.64897  
 H +3.81366 -0.77785 -2.03554  
 H +3.32680 -2.29370 -2.75714  
 H +4.19533 -2.56818 -0.40033  
 H +2.53264 -3.14309 -0.61941  
 H +4.60288 -0.68465 +0.99133  
 H +3.26458 -0.00623 +1.91153  
 H +4.35559 +0.85889 -0.74673  
 H +3.81505 +1.82840 +0.60424  
 H +0.78103 +0.48729 -3.27414  
 H +2.35728 +0.02270 -3.91180  
 H +2.04438 +2.30126 -2.49828  
 H +3.52651 +1.38673 -2.39626  
 H +1.85558 +3.21439 -0.20666  
 H +0.09466 -0.92140 +2.72571  
 H +0.15144 +0.53654 +4.74771  
 H +0.85624 +2.92949 +4.49876  
 H +1.47377 +3.76187 +2.21085  
 H -1.70673 -0.41054 -1.86928  
 H -3.16111 +1.42484 -2.73390  
 H -2.45362 +3.79833 -2.35017  
 H -0.29702 +4.22933 -1.14017  
 H +0.82130 -2.93102 -2.27643  
 H -0.14418 -1.63023 -2.96780  
 H +1.27474 -2.23637 -3.86397  
 H +1.61041 -2.95957 +1.41108  
 H +3.34037 -2.83400 +1.87611  
 H +2.14916 -1.69508 +2.52104  
 N -0.07957 -1.90290 -0.07637  
 S -1.36543 -2.35502 +0.69330  
 O -1.14779 -2.47324 +2.17424  
 O -1.92134 -3.59634 +0.08072  
 C -2.73064 -1.15242 +0.54353  
 C -2.74130 +0.01176 +1.31232  
 C -3.73452 -1.36093 -0.40206  
 C -3.73359 +0.96685 +1.11690  
 H -1.98377 +0.17697 +2.06480  
 C -4.72688 -0.40073 -0.58837  
 H -3.72869 -2.26903 -0.99173  
 C -4.73871 +0.78243 +0.15875  
 H -3.72432 +1.87329 +1.71378  
 H -5.49830 -0.56909 -1.33303  
 C -5.81292 +1.82035 -0.04234  
 H -6.24735 +1.75500 -1.04255  
 H -6.62572 +1.68502 +0.68004  
 H -5.41846 +2.83001 +0.09812

**2NTs(III)q**

E = -3152.749719

G = -3152.227756

1,4

N +2.20680 -1.40374 -1.82703  
 C +3.56480 -1.64524 -1.28205  
 C +3.48925 -1.94740 +0.20742  
 N +2.69824 -0.93989 +0.98198  
 C +3.40777 +0.36394 +1.21700  
 C +3.38997 +1.33259 +0.02635  
 N +2.18051 +1.16243 -0.85674  
 C +2.18841 -0.37400 -2.87625  
 C +2.57374 +0.99875 -2.30829  
 C +1.15998 +2.25927 -0.73415  
 C -0.07503 +1.76328 -1.46408  
 C +0.79572 +2.47818 +0.71981  
 N +0.53716 +1.35019 +1.39579  
 C +0.16282 +1.44269 +2.67838  
 C +0.03425 +2.66733 +3.32793  
 C +0.30887 +3.83529 +2.62245  
 C +0.69882 +3.74216 +1.28827  
 N -0.31793 +0.44601 -1.28929  
 C -1.36202 -0.12348 -1.90651  
 C -2.22751 +0.61212 -2.70363  
 C -1.99867 +1.97542 -2.86583  
 C -0.89931 +2.56109 -2.24104  
 Fe +1.02612 -0.48876 -0.11418  
 C +1.57942 -2.64851 -2.29824  
 C +2.39383 -1.52783 +2.31317  
 H +4.19167 -0.77723 -1.46744  
 H +4.04455 -2.48826 -1.79122  
 H +4.49432 -2.03124 +0.63271  
 H +2.97563 -2.89768 +0.34969  
 H +4.44317 +0.16340 +1.50918  
 H +2.90655 +0.82341 +2.06322  
 H +4.27384 +1.18524 -0.58602  
 H +3.43530 +2.35564 +0.40371  
 H +1.17568 -0.34307 -3.27530  
 H +2.86607 -0.62281 -3.70337  
 H +2.09884 +1.77603 -2.90596  
 H +3.64558 +1.15962 -2.38444  
 H +1.52864 +3.18615 -1.17687  
 H -0.05560 +0.50422 +3.17257  
 H -0.27487 +2.69652 +4.36523  
 H +0.22384 +4.80349 +3.10171  
 H +0.92553 +4.62220 +0.69969  
 H -1.48467 -1.18199 -1.73370  
 H -3.06408 +0.11922 -3.18019  
 H -2.65985 +2.57474 -3.48006  
 H -0.67278 +3.61291 -2.35871  
 H +1.58754 -3.38555 -1.49675  
 H +0.54111 -2.44728 -2.56190

H +2.10705 -3.05387 -3.17165  
H +1.89776 -2.48278 +2.16956  
H +3.32010 -1.66522 +2.88131  
H +1.71758 -0.87250 +2.85233  
N -0.00256 -1.85775 +0.36748  
S -1.12208 -2.10722 +1.45250  
O -0.84762 -1.49077 +2.78151  
O -1.45336 -3.55514 +1.50617  
C -2.61462 -1.28365 +0.84298  
C -2.82561 +0.06653 +1.12212  
C -3.49904 -1.97516 +0.01921  
C -3.91748 +0.72184 +0.56521  
H -2.14216 +0.59843 +1.76879  
C -4.59155 -1.30784 -0.53236  
H -3.33286 -3.02543 -0.18698  
C -4.81340 +0.04979 -0.27789  
H -4.07531 +1.77345 +0.78244  
H -5.27805 -1.85061 -1.17371  
C -5.96978 +0.78646 -0.90326  
H -6.63772 +0.10638 -1.43551  
H -6.55343 +1.32045 -0.14764  
H -5.61002 +1.53363 -1.61877

#### 2NTs(III)sext

E = -3152.762106

G = -3152.242067

1,6

N +2.15601 -1.47218 -1.67598  
C +3.56522 -1.64253 -1.22307  
C +3.63880 -1.81727 +0.28620  
N +2.89180 -0.77267 +1.04201  
C +3.55696 +0.55833 +1.09908  
C +3.47048 +1.38983 -0.19309  
N +2.20980 +1.19136 -0.97101  
C +2.05869 -0.53113 -2.81619  
C +2.47194 +0.89983 -2.41669  
C +1.21516 +2.27913 -0.78637  
C -0.06026 +1.87744 -1.51461  
C +0.85483 +2.38392 +0.68559  
N +0.57237 +1.20406 +1.26515  
C +0.15760 +1.17565 +2.53833  
C +0.02642 +2.33829 +3.29050  
C +0.33731 +3.55911 +2.69966  
C +0.75556 +3.58602 +1.36979  
N -0.40579 +0.58866 -1.34674  
C -1.52171 +0.12446 -1.92034  
C -2.34737 +0.93793 -2.68680  
C -1.99823 +2.27475 -2.85386  
C -0.83252 +2.75616 -2.25895  
Fe +0.96562 -0.55346 -0.03416  
C +1.54639 -2.77397 -2.02164  
C +2.69547 -1.26529 +2.42701  
H +4.15006 -0.78480 -1.54039

H +4.00948 -2.51754 -1.70705  
H +4.68615 -1.84254 +0.60853  
H +3.18004 -2.77035 +0.55250  
H +4.61310 +0.43698 +1.36720  
H +3.07575 +1.10020 +1.90997  
H +4.30522 +1.13966 -0.84101  
H +3.59075 +2.44377 +0.07216  
H +1.02239 -0.54521 -3.14886  
H +2.68332 -0.87240 -3.65025  
H +1.93111 +1.60401 -3.04923  
H +3.52923 +1.06007 -2.61786  
H +1.58004 +3.23978 -1.15882  
H -0.08261 +0.19725 +2.93913  
H -0.31262 +2.27918 +4.31682  
H +0.25300 +4.48076 +3.26325  
H +0.99878 +4.51527 +0.87055  
H -1.74637 -0.91867 -1.74674  
H -3.24447 +0.52807 -3.13119  
H -2.62176 +2.93627 -3.44355  
H -0.52227 +3.78719 -2.37159  
H +1.62559 -3.44367 -1.16653  
H +0.48990 -2.62591 -2.24393  
H +2.04532 -3.22446 -2.88773  
H +2.11269 -2.18369 +2.39789  
H +3.66022 -1.45180 +2.91350  
H +2.14660 -0.52576 +3.00535  
N -0.12211 -1.80904 +0.68537  
S -1.33056 -2.25066 +1.57577  
O -1.21416 -1.75351 +2.97946  
O -1.62302 -3.70452 +1.46794  
C -2.76550 -1.39588 +0.87742  
C -2.98721 -0.05475 +1.19535  
C -3.57580 -2.03728 -0.05489  
C -4.01029 +0.64158 +0.56445  
H -2.36799 +0.43862 +1.93258  
C -4.60133 -1.32771 -0.68031  
H -3.40197 -3.07988 -0.29128  
C -4.82706 +0.02154 -0.39205  
H -4.17252 +1.68666 +0.80804  
H -5.22593 -1.82935 -1.41192  
C -5.91170 +0.80308 -1.08786  
H -6.37581 +0.22156 -1.88700  
H -6.69711 +1.09628 -0.38330  
H -5.51127 +1.72373 -1.52280

#### 2NHTs(III)d

E = -3153.236299

G = -3152.694389

2,2

N +2.13395 -0.65679 -1.81686  
C +3.49895 -1.15656 -1.43734  
C +3.39732 -1.99516 -0.18961  
N +2.61335 -1.29649 +0.88016

C +3.37504 -0.22115 +1.61287  
 C +3.45027 +1.11403 +0.86485  
 N +2.26308 +1.33898 -0.04543  
 C +2.26229 +0.68146 -2.46753  
 C +2.69992 +1.73200 -1.44341  
 C +1.25169 +2.31721 +0.49439  
 C +0.09084 +2.26841 -0.47550  
 C +0.74404 +1.76681 +1.80019  
 N +0.45592 +0.44765 +1.73299  
 C -0.05283 -0.15377 +2.82001  
 C -0.29013 +0.54069 +3.99967  
 C +0.01624 +1.89462 +4.06743  
 C +0.54476 +2.52230 +2.94175  
 N -0.17603 +1.00867 -0.87852  
 C -1.14352 +0.79493 -1.77918  
 C -1.91243 +1.83715 -2.27812  
 C -1.66070 +3.13342 -1.83982  
 C -0.63211 +3.35789 -0.92602  
 Fe +1.08964 -0.31821 -0.05077  
 C +1.50848 -1.59585 -2.78475  
 C +2.25246 -2.34167 +1.88151  
 H +4.16340 -0.31187 -1.28680  
 H +3.91601 -1.74442 -2.25731  
 H +4.38819 -2.25986 +0.18821  
 H +2.85549 -2.91478 -0.41132  
 H +4.38477 -0.57792 +1.83099  
 H +2.86107 -0.08055 +2.55943  
 H +4.34574 +1.15261 +0.25479  
 H +3.51756 +1.92951 +1.58584  
 H +1.29737 +0.93189 -2.89792  
 H +2.98889 +0.62362 -3.28303  
 H +2.27432 +2.69923 -1.70396  
 H +3.77871 +1.85409 -1.44060  
 H +1.66740 +3.31867 +0.59828  
 H -0.29489 -1.20078 +2.72478  
 H -0.70915 +0.01292 +4.84640  
 H -0.15070 +2.45502 +4.97920  
 H +0.80308 +3.57305 +2.94134  
 H -1.28519 -0.22597 -2.09470  
 H -2.69297 +1.62516 -2.99566  
 H -2.24679 +3.96336 -2.21513  
 H -0.38162 +4.35195 -0.57991  
 H +1.54552 -2.61090 -2.39293  
 H +0.47302 -1.31128 -2.95140  
 H +2.05687 -1.56542 -3.72995  
 H +1.60574 -3.07919 +1.41607  
 H +3.16650 -2.82287 +2.24076  
 H +1.74077 -1.89626 +2.72739  
 N -0.00909 -1.85344 -0.23330  
 S -1.42394 -2.49004 +0.32122  
 O -1.41131 -2.64717 +1.78941  
 O -1.67983 -3.70658 -0.47195  
 C -2.71486 -1.30213 -0.04795

C -2.94807 -0.22978 +0.81213  
 C -3.47261 -1.47069 -1.20483  
 C -3.93000 +0.69738 +0.48687  
 H -2.37947 -0.11637 +1.72397  
 C -4.45897 -0.53753 -1.51011  
 H -3.29058 -2.31545 -1.85700  
 C -4.69448 +0.56463 -0.68007  
 H -4.10622 +1.53759 +1.14963  
 H -5.04918 -0.66483 -2.41081  
 C -5.72047 +1.60519 -1.04113  
 H -6.40792 +1.24228 -1.80747  
 H -6.30121 +1.90877 -0.16628  
 H -5.22806 +2.50326 -1.43030  
 H +0.44995 -2.63111 -0.70409

**2NHTs(III)q**

E = -3153.22501

G = -3152.689552

2,4

N +2.07507 -1.08412 -2.10878  
 C +3.44219 -1.48285 -1.67196  
 C +3.38227 -2.07449 -0.27774  
 N +2.67283 -1.18315 +0.70335  
 C +3.47234 +0.01804 +1.15770  
 C +3.47639 +1.19663 +0.17704  
 N +2.23206 +1.25358 -0.67532  
 C +2.09062 +0.12821 -2.94818  
 C +2.56673 +1.34794 -2.14859  
 C +1.26580 +2.34583 -0.30670  
 C -0.00267 +2.04398 -1.07977  
 C +0.94197 +2.27900 +1.16950  
 N +0.64980 +1.04530 +1.60500  
 C +0.29387 +0.87904 +2.88595  
 C +0.22038 +1.94725 +3.77433  
 C +0.53348 +3.22484 +3.32017  
 C +0.90318 +3.39794 +1.98821  
 N -0.29461 +0.72397 -1.15238  
 C -1.37049 +0.31354 -1.84050  
 C -2.22219 +1.21791 -2.45679  
 C -1.94420 +2.57758 -2.36500  
 C -0.81041 +2.99844 -1.67267  
 Fe +1.01780 -0.45557 -0.19448  
 C +1.39530 -2.18739 -2.81802  
 C +2.36548 -1.99814 +1.91451  
 H +4.10012 -0.61917 -1.69823  
 H +3.86542 -2.21990 -2.36040  
 H +4.38420 -2.29159 +0.10106  
 H +2.81060 -3.00117 -0.30141  
 H +4.49713 -0.30584 +1.35483  
 H +3.03025 +0.32691 +2.09923  
 H +4.33273 +1.13081 -0.48557  
 H +3.58002 +2.12499 +0.74036  
 H +1.07671 +0.28215 -3.31238

H +2.74291 -0.00440 -3.81885  
 H +2.11307 +2.24501 -2.56665  
 H +3.64188 +1.46974 -2.23703  
 H +1.66897 +3.32413 -0.56961  
 H +0.05121 -0.13049 +3.18841  
 H -0.07628 +1.77139 +4.80030  
 H +0.49255 +4.07473 +3.99081  
 H +1.15651 +4.37137 +1.58829  
 H -1.53535 -0.75145 -1.88474  
 H -3.08676 +0.85135 -2.99286  
 H -2.59442 +3.30390 -2.83703  
 H -0.54351 +4.04457 -1.60049  
 H +1.43108 -3.09205 -2.21157  
 H +0.35459 -1.91344 -2.99592  
 H +1.88321 -2.38909 -3.77818  
 H +1.81503 -2.88374 +1.61433  
 H +3.30323 -2.28106 +2.40077  
 H +1.75523 -1.41867 +2.59887  
 N -0.11086 -2.01285 -0.02505  
 S -1.28953 -2.41466 +1.04927  
 O -0.84153 -2.01301 +2.38972  
 O -1.66393 -3.81746 +0.81730  
 C -2.70258 -1.38989 +0.62971  
 C -2.80363 -0.10972 +1.17458  
 C -3.62247 -1.84272 -0.31254  
 C -3.83554 +0.72247 +0.76160  
 H -2.08717 +0.23091 +1.90865  
 C -4.65222 -0.99507 -0.71378  
 H -3.53738 -2.83938 -0.72756  
 C -4.76945 +0.29897 -0.19445  
 H -3.91267 +1.72007 +1.18044  
 H -5.37043 -1.34386 -1.44746  
 C -5.85566 +1.23260 -0.65885  
 H -6.54713 +0.73573 -1.34153  
 H -6.42662 +1.62266 +0.18878  
 H -5.42337 +2.09394 -1.17853  
 H -0.23152 -2.58193 -0.86130

**2NHTs(III)sext**

E = -3153.237014

G = -3152.706353

2,6

N +2.08536 -1.13369 -2.01376  
 C +3.49181 -1.45721 -1.62161  
 C +3.55079 -1.97851 -0.19832  
 N +2.85428 -1.09190 +0.78261  
 C +3.58214 +0.16376 +1.13289  
 C +3.50542 +1.27534 +0.07150  
 N +2.24181 +1.26958 -0.73966  
 C +2.02824 +0.03672 -2.92251  
 C +2.51611 +1.30842 -2.21721  
 C +1.27485 +2.33549 -0.35313  
 C -0.00925 +2.08896 -1.12804

C +0.93907 +2.18874 +1.11323  
 N +0.67631 +0.92415 +1.48945  
 C +0.29911 +0.68210 +2.75451  
 C +0.17950 +1.70164 +3.69092  
 C +0.46247 +3.00772 +3.30470  
 C +0.84858 +3.25798 +1.98960  
 N -0.37246 +0.79398 -1.18249  
 C -1.49117 +0.44295 -1.83201  
 C -2.30393 +1.38628 -2.44508  
 C -1.94105 +2.72791 -2.37695  
 C -0.77146 +3.08873 -1.70899  
 Fe +0.96513 -0.57119 -0.15356  
 C +1.44014 -2.30479 -2.65360  
 C +2.61881 -1.88340 +2.02052  
 H +4.11121 -0.57452 -1.74020  
 H +3.89506 -2.21443 -2.29864  
 H +4.59132 -2.12357 +0.10833  
 H +3.04126 -2.94119 -0.15058  
 H +4.63364 -0.06806 +1.32896  
 H +3.14471 +0.51665 +2.06264  
 H +4.34012 +1.17968 -0.61510  
 H +3.62387 +2.23811 +0.57285  
 H +0.99353 +0.14378 -3.24085  
 H +2.63779 -0.15168 -3.81281  
 H +2.02666 +2.17109 -2.66878  
 H +3.58360 +1.44801 -2.36745  
 H +1.66697 +3.33260 -0.56244  
 H +0.07915 -0.34830 +2.99738  
 H -0.13092 +1.46594 +4.70044  
 H +0.38403 +3.82229 +4.01471  
 H +1.07589 +4.25785 +1.64358  
 H -1.72088 -0.61252 -1.85271  
 H -3.20236 +1.06856 -2.95657  
 H -2.55638 +3.48702 -2.84470  
 H -0.44862 +4.11983 -1.64663  
 H +1.49898 -3.16195 -1.98380  
 H +0.39468 -2.07129 -2.85624  
 H +1.94315 -2.54798 -3.59472  
 H +1.97310 -2.72730 +1.78559  
 H +3.57075 -2.24468 +2.42307  
 H +2.13117 -1.26327 +2.76686  
 N -0.27819 -2.11517 -0.02228  
 S -1.44876 -2.51586 +1.05719  
 O -0.97551 -2.14745 +2.40024  
 O -1.87368 -3.90305 +0.81616  
 C -2.82532 -1.43719 +0.64865  
 C -2.89513 -0.16573 +1.21784  
 C -3.72909 -1.83217 -0.33468  
 C -3.87593 +0.71678 +0.78453  
 H -2.19570 +0.13103 +1.98690  
 C -4.70652 -0.93419 -0.75705  
 H -3.66724 -2.82238 -0.76892  
 C -4.78746 +0.35395 -0.21689

H -3.92845 +1.70830 +1.22124  
H -5.40791 -1.23692 -1.52660  
C -5.80596 +1.34719 -0.70879  
H -6.48520 +0.90056 -1.43711  
H -6.39997 +1.74437 +0.11953  
H -5.30803 +2.19866 -1.18417  
H -0.43839 -2.66206 -0.86670

#### 2NTs(IV)t

E = -3152.578261

G = -3152.050469

2,3

N -1.83127 -1.46875 -0.21646  
C -3.00946 -0.86783 +0.49615  
C -3.28572 +0.51103 -0.04865  
N -2.03935 +1.34205 -0.10876  
C -1.59367 +1.91850 +1.20919  
C -0.85247 +0.92315 +2.10168  
N -0.11109 -0.11949 +1.29755  
C -1.08430 -2.36062 +0.71727  
C -0.39567 -1.52377 +1.79972  
C +1.37077 +0.12198 +1.20383  
C +1.89506 -0.93205 +0.24857  
C +1.58324 +1.43798 +0.49855  
N +0.79589 +1.56739 -0.59278  
C +0.97422 +2.61518 -1.41007  
C +1.92997 +3.58759 -1.14130  
C +2.71234 +3.47729 +0.00244  
C +2.54116 +2.37504 +0.83852  
N +1.07524 -1.10829 -0.81015  
C +1.41722 -1.96996 -1.77615  
C +2.60562 -2.68639 -1.71882  
C +3.45191 -2.50806 -0.62945  
C +3.09031 -1.61434 +0.37842  
Fe -0.55877 +0.07616 -0.68909  
C -2.29180 -2.24924 -1.39489  
C -2.34012 +2.49264 -1.00923  
H -2.80253 -0.83270 +1.56079  
H -3.88267 -1.50924 +0.36206  
H -4.04322 +1.02406 +0.54913  
H -3.64353 +0.43307 -1.07442  
H -2.46106 +2.31894 +1.73962  
H -0.93821 +2.75033 +0.96564  
H -1.54997 +0.40637 +2.75185  
H -0.15053 +1.45971 +2.74123  
H -0.35960 -2.91730 +0.13067  
H -1.77493 -3.07655 +1.17146  
H +0.53411 -2.00203 +2.10153  
H -1.01261 -1.44463 +2.68986  
H +1.85343 +0.08396 +2.17968  
H +0.34508 +2.66409 -2.28708  
H +2.04644 +4.41647 -1.82702  
H +3.45365 +4.23101 +0.23829

H +3.13948 +2.23331 +1.72875  
H +0.72184 -2.07846 -2.59295  
H +2.85427 -3.36544 -2.52343  
H +4.38274 -3.05773 -0.56088  
H +3.71473 -1.44745 +1.24620  
H -2.88274 -1.60567 -2.04133  
H -1.42890 -2.60826 -1.94980  
H -2.89366 -3.09778 -1.05771  
H -2.61370 +2.12163 -1.99131  
H -3.16972 +3.06659 -0.58670  
H -1.47348 +3.14005 -1.09393  
N -0.91811 +0.12604 -2.37405  
S -0.90220 +0.55167 -3.92712  
O -0.68888 +2.00690 -4.06121  
O -2.09792 -0.00983 -4.57506  
C +0.53952 -0.28745 -4.56418  
C +1.80257 +0.26039 -4.33544  
C +0.38980 -1.53796 -5.16135  
C +2.92627 -0.46416 -4.71156  
H +1.90690 +1.23099 -3.86726  
C +1.52753 -2.24745 -5.53149  
H -0.59802 -1.95049 -5.32305  
C +2.80882 -1.72930 -5.30445  
H +3.91158 -0.04908 -4.53011  
H +1.41870 -3.22314 -5.99200  
C +4.03603 -2.50589 -5.69973  
H +3.83663 -3.57919 -5.72472  
H +4.37230 -2.20821 -6.69912  
H +4.86095 -2.31873 -5.00840

#### 2NTs(IV)q

E = -3152.563488

G = -3152.040315

2,5

N +1.73414 -1.05470 -2.28491  
C +3.08187 -1.63633 -2.02748  
C +3.11041 -2.33982 -0.68223  
N +2.59576 -1.49432 +0.44465  
C +3.53548 -0.41851 +0.91133  
C +3.56847 +0.82064 +0.01337  
N +2.25575 +1.08184 -0.69917  
C +1.81928 +0.21654 -3.03962  
C +2.47492 +1.30881 -2.18738  
C +1.47172 +2.23227 -0.11770  
C +0.13039 +2.22633 -0.82442  
C +1.21301 +1.95759 +1.34509  
N +0.80075 +0.69892 +1.58345  
C +0.46613 +0.34974 +2.83326  
C +0.54210 +1.24995 +3.89029  
C +0.98261 +2.54575 +3.64392  
C +1.32404 +2.91175 +2.34272  
N -0.35031 +0.98242 -1.04240

C -1.52618 +0.81630 -1.66304  
C -2.28790 +1.90363 -2.06709  
C -1.81024 +3.18772 -1.82382  
C -0.57501 +3.35555 -1.19764  
Fe +0.92445 -0.47872 -0.32071  
C +0.85286 -2.01755 -2.98255  
C +2.32663 -2.40417 +1.59247  
H +3.83007 -0.85088 -2.07173  
H +3.33372 -2.35482 -2.81200  
H +4.12617 -2.67011 -0.44782  
H +2.46134 -3.21347 -0.72058  
H +4.54355 -0.83415 +0.99584  
H +3.20599 -0.14073 +1.90838  
H +4.33592 +0.71683 -0.74503  
H +3.83159 +1.69129 +0.61508  
H +0.80446 +0.50069 -3.30876  
H +2.38774 +0.07701 -3.96497  
H +2.06598 +2.27733 -2.46845  
H +3.54575 +1.35668 -2.36150  
H +2.00120 +3.17417 -0.26202  
H +0.12495 -0.66665 +2.97424  
H +0.26095 +0.92937 +4.88500  
H +1.06004 +3.26447 +4.45089  
H +1.66739 +3.90959 +2.10300  
H -1.83948 -0.20229 -1.83458  
H -3.23704 +1.73696 -2.55793  
H -2.38659 +4.05326 -2.12714  
H -0.16123 +4.33727 -1.00845  
H +0.81689 -2.94788 -2.41903  
H -0.15372 -1.60495 -3.03559  
H +1.22880 -2.21115 -3.99275  
H +1.62124 -3.17075 +1.28496  
H +3.26328 -2.87054 +1.91246  
H +1.90594 -1.84242 +2.42016  
N -0.22161 -1.74258 -0.10135  
S -1.40346 -2.38000 +0.82844  
O -1.01712 -2.35983 +2.25058  
O -1.75657 -3.68103 +0.24296  
C -2.77534 -1.25886 +0.59723  
C -2.84073 -0.08887 +1.35610  
C -3.70777 -1.52496 -0.40342  
C -3.85223 +0.82451 +1.09603  
H -2.11672 +0.10765 +2.13496  
C -4.71680 -0.59794 -0.64629  
H -3.63963 -2.43524 -0.98559  
C -4.79868 +0.59124 +0.08726  
H -3.90404 +1.73867 +1.67736  
H -5.44301 -0.79687 -1.42632  
C -5.87587 +1.60499 -0.18957  
H -6.41456 +1.37509 -1.11033  
H -6.60113 +1.62931 +0.63058  
H -5.45228 +2.60947 -0.27537

|    |         |          |          |
|----|---------|----------|----------|
| Fe | 0.02954 | -0.32435 | -0.42433 |
| O  | 0.25555 | -0.32524 | -2.15477 |

**1O(III)d**

E = -2353.422671

G = -2353.013827

1,2

|   |          |          |          |
|---|----------|----------|----------|
| N | -1.50149 | 0.92723  | -0.35584 |
| N | -0.36997 | -0.44654 | 1.65093  |
| N | -1.13229 | -2.05514 | -0.50077 |
| N | 1.58345  | -1.53798 | -0.02996 |
| N | 1.41551  | 1.11522  | -0.25478 |
| C | -2.17706 | 1.36872  | -1.42875 |
| H | -1.79073 | 1.01204  | -2.37503 |
| C | -3.27338 | 2.21093  | -1.31170 |
| H | -3.79359 | 2.54425  | -2.20071 |
| C | -3.68438 | 2.60511  | -0.03988 |
| H | -4.54319 | 3.25384  | 0.08560  |
| C | -2.97634 | 2.15439  | 1.07112  |
| H | -3.26227 | 2.44135  | 2.07547  |
| C | -1.88025 | 1.32217  | 0.87992  |
| C | -0.98326 | 0.85389  | 2.00137  |
| H | -1.52626 | 0.81390  | 2.95015  |
| H | -0.18026 | 1.58644  | 2.11215  |
| C | -1.29561 | -1.58981 | 1.92443  |
| H | -2.00542 | -1.32264 | 2.71100  |
| H | -0.70920 | -2.42548 | 2.30156  |
| C | -2.05120 | -1.99856 | 0.66429  |
| H | -2.55238 | -2.96092 | 0.82358  |
| H | -2.81657 | -1.25950 | 0.43137  |
| C | -1.90164 | -2.13806 | -1.75882 |
| H | -2.43289 | -3.09427 | -1.83319 |
| H | -1.20042 | -1.99001 | -2.57785 |
| H | -2.62562 | -1.32430 | -1.78547 |
| C | -0.18102 | -3.21516 | -0.39815 |
| H | -0.49786 | -4.01895 | -1.06685 |
| H | -0.21929 | -3.61893 | 0.61206  |
| C | 1.23783  | -2.79089 | -0.75542 |
| H | 1.94931  | -3.59423 | -0.53358 |
| H | 1.27621  | -2.53605 | -1.81257 |
| C | 1.72982  | -1.73096 | 1.45639  |
| H | 2.78626  | -1.70760 | 1.73210  |
| H | 1.36097  | -2.72198 | 1.71200  |
| C | 0.97234  | -0.65889 | 2.24871  |
| H | 0.90608  | -0.95572 | 3.30157  |
| H | 1.50578  | 0.28784  | 2.19829  |
| C | 2.75826  | -0.85148 | -0.61798 |
| H | 2.69203  | -0.98235 | -1.69913 |
| H | 3.70135  | -1.27441 | -0.26067 |
| C | 2.67161  | 0.62565  | -0.34748 |
| C | 3.78945  | 1.44744  | -0.26637 |
| H | 4.77888  | 1.01130  | -0.32705 |
| C | 3.61202  | 2.81923  | -0.11457 |
| H | 4.46795  | 3.48058  | -0.05055 |
| C | 2.31648  | 3.32489  | -0.05128 |
| H | 2.12734  | 4.38544  | 0.05574  |
| C | 1.24910  | 2.44010  | -0.12278 |
| H | 0.22837  | 2.79349  | -0.07453 |

**1O(III)q**

E = -2353.447608

G = -2353.04313

1,4

|   |          |          |          |
|---|----------|----------|----------|
| N | 1.58965  | -1.09101 | -0.41202 |
| N | 0.42637  | 0.31861  | 1.58892  |
| N | 1.27707  | 2.14692  | -0.43065 |
| N | -1.53055 | 1.62275  | 0.02970  |
| N | -1.68742 | -1.11150 | -0.25325 |
| C | 2.33795  | -1.49614 | -1.44925 |
| H | 2.00972  | -1.12891 | -2.41374 |
| C | 3.44635  | -2.31488 | -1.28449 |
| H | 4.02519  | -2.61978 | -2.14718 |
| C | 3.79648  | -2.71724 | 0.00314  |
| H | 4.66372  | -3.34572 | 0.16772  |
| C | 3.01977  | -2.29533 | 1.07976  |
| H | 3.26199  | -2.58295 | 2.09542  |
| C | 1.91547  | -1.48772 | 0.83611  |
| C | 0.96254  | -1.02826 | 1.91165  |
| H | 1.43500  | -1.04972 | 2.89762  |
| H | 0.12010  | -1.72339 | 1.92884  |
| C | 1.40905  | 1.40135  | 1.93204  |
| H | 2.11845  | 1.03175  | 2.67644  |
| H | 0.86448  | 2.21903  | 2.40085  |
| C | 2.17613  | 1.90534  | 0.71216  |
| H | 2.74058  | 2.80673  | 0.98996  |
| H | 2.89427  | 1.14986  | 0.39321  |
| C | 2.03162  | 2.30511  | -1.68080 |
| H | 2.65528  | 3.20983  | -1.66681 |
| H | 1.32696  | 2.34204  | -2.50912 |
| H | 2.66826  | 1.43222  | -1.82736 |
| C | 0.32686  | 3.27142  | -0.21975 |
| H | 0.62710  | 4.13931  | -0.81471 |
| H | 0.36614  | 3.58783  | 0.82146  |
| C | -1.10753 | 2.89349  | -0.60835 |
| H | -1.78466 | 3.71765  | -0.35119 |
| H | -1.14996 | 2.72278  | -1.68338 |
| C | -1.63526 | 1.71057  | 1.51887  |
| H | -2.68491 | 1.69370  | 1.82406  |
| H | -1.23352 | 2.66983  | 1.83882  |
| C | -0.89787 | 0.56371  | 2.22287  |
| H | -0.78882 | 0.79245  | 3.28876  |
| H | -1.47209 | -0.35465 | 2.13389  |
| C | -2.74027 | 1.05203  | -0.58826 |
| H | -2.64472 | 1.19166  | -1.66716 |
| H | -3.64956 | 1.56103  | -0.25017 |
| C | -2.84693 | -0.43987 | -0.34650 |
| C | -4.07559 | -1.09353 | -0.29420 |
| H | -4.99415 | -0.52264 | -0.35789 |
| C | -4.09654 | -2.47890 | -0.16234 |
| H | -5.04041 | -3.00999 | -0.12051 |
| C | -2.89032 | -3.17182 | -0.08345 |
| H | -2.86290 | -4.24946 | 0.01797  |
| C | -1.70789 | -2.44368 | -0.12913 |

|    |          |          |          |
|----|----------|----------|----------|
| H  | -0.74043 | -2.92907 | -0.06350 |
| Fe | 0.04694  | 0.26336  | -0.54221 |
| O  | -0.12770 | 0.29836  | -2.17304 |

|    |          |          |          |
|----|----------|----------|----------|
| H  | -2.46947 | -4.39863 | -0.02205 |
| C  | -1.49104 | -2.50150 | -0.25133 |
| H  | -0.48348 | -2.89961 | -0.28132 |
| Fe | 0.01961  | 0.29378  | -0.71307 |
| O  | -0.16751 | 0.40525  | -2.42158 |

**1O(III)sext**

E = -2353.447448

G = -2353.045607

1,6

|   |          |          |          |
|---|----------|----------|----------|
| N | 1.67746  | -1.03062 | -0.39514 |
| N | 0.41202  | 0.31401  | 1.65867  |
| N | 1.10329  | 2.23226  | -0.37695 |
| N | -1.65461 | 1.52830  | 0.07739  |
| N | -1.59827 | -1.17113 | -0.35787 |
| C | 2.45323  | -1.39929 | -1.42634 |
| H | 2.11545  | -1.05647 | -2.39680 |
| C | 3.60321  | -2.15438 | -1.24980 |
| H | 4.20775  | -2.43189 | -2.10375 |
| C | 3.95471  | -2.53206 | 0.04490  |
| H | 4.85129  | -3.11459 | 0.22244  |
| C | 3.14780  | -2.14744 | 1.11208  |
| H | 3.39743  | -2.41983 | 2.13019  |
| C | 2.00493  | -1.39575 | 0.85727  |
| C | 1.03453  | -0.98758 | 1.94501  |
| H | 1.53381  | -1.00426 | 2.92050  |
| H | 0.24474  | -1.74340 | 1.97034  |
| C | 1.30108  | 1.45700  | 1.99402  |
| H | 2.05559  | 1.15060  | 2.72525  |
| H | 0.70588  | 2.23197  | 2.47508  |
| C | 2.01801  | 2.03061  | 0.76926  |
| H | 2.51668  | 2.96819  | 1.04907  |
| H | 2.78802  | 1.33410  | 0.43500  |
| C | 1.86670  | 2.49391  | -1.61143 |
| H | 2.43561  | 3.43011  | -1.53956 |
| H | 1.17311  | 2.52532  | -2.44862 |
| H | 2.55542  | 1.66619  | -1.78471 |
| C | 0.08487  | 3.29541  | -0.13570 |
| H | 0.33476  | 4.19269  | -0.70866 |
| H | 0.11134  | 3.58317  | 0.91371  |
| C | -1.32308 | 2.84095  | -0.53066 |
| H | -2.05077 | 3.61146  | -0.24676 |
| H | -1.36242 | 2.69968  | -1.61068 |
| C | -1.74318 | 1.56657  | 1.56548  |
| H | -2.78702 | 1.48363  | 1.88073  |
| H | -1.39465 | 2.53890  | 1.90827  |
| C | -0.93644 | 0.44973  | 2.24538  |
| H | -0.89358 | 0.65373  | 3.32357  |
| H | -1.44628 | -0.50221 | 2.11152  |
| C | -2.83632 | 0.89731  | -0.54092 |
| H | -2.77399 | 1.07502  | -1.61715 |
| H | -3.77215 | 1.32837  | -0.16972 |
| C | -2.81596 | -0.60029 | -0.33299 |
| C | -3.97227 | -1.35755 | -0.17866 |
| H | -4.93712 | -0.86676 | -0.14709 |
| C | -3.86157 | -2.74080 | -0.06517 |
| H | -4.74837 | -3.35160 | 0.05721  |
| C | -2.59865 | -3.32716 | -0.10648 |

**1OH(III)d**

E = -2353.945465

G = -2353.523349

2,2

|   |          |          |          |
|---|----------|----------|----------|
| N | -1.53265 | 0.89619  | -0.34458 |
| N | -0.35219 | -0.43748 | 1.62486  |
| N | -1.10314 | -2.05200 | -0.50843 |
| N | 1.58942  | -1.51807 | 0.00459  |
| N | 1.40535  | 1.12141  | -0.21836 |
| C | -2.21042 | 1.33628  | -1.41762 |
| H | -1.85195 | 0.99224  | -2.37733 |
| C | -3.29907 | 2.18538  | -1.29566 |
| H | -3.82158 | 2.51540  | -2.18385 |
| C | -3.69712 | 2.59025  | -0.02420 |
| H | -4.55102 | 3.24465  | 0.10238  |
| C | -2.98226 | 2.14826  | 1.08475  |
| H | -3.25370 | 2.44755  | 2.08896  |
| C | -1.89413 | 1.30927  | 0.89177  |
| C | -0.98051 | 0.86011  | 1.99862  |
| H | -1.50446 | 0.78636  | 2.95274  |
| H | -0.18893 | 1.60373  | 2.11167  |
| C | -1.29055 | -1.58323 | 1.90916  |
| H | -1.99703 | -1.29580 | 2.68822  |
| H | -0.70635 | -2.41329 | 2.29895  |
| C | -2.03840 | -1.99573 | 0.65271  |
| H | -2.51871 | -2.96744 | 0.80255  |
| H | -2.81334 | -1.27229 | 0.40693  |
| C | -1.89752 | -2.20085 | -1.75225 |
| H | -2.55108 | -3.07465 | -1.67621 |
| H | -1.23187 | -2.34435 | -2.60224 |
| H | -2.50854 | -1.31391 | -1.90744 |
| C | -0.14595 | -3.21933 | -0.38068 |
| H | -0.45483 | -4.02091 | -1.05224 |
| H | -0.20551 | -3.61605 | 0.62954  |
| C | 1.27558  | -2.79160 | -0.71265 |
| H | 1.98910  | -3.57449 | -0.44230 |
| H | 1.36392  | -2.57952 | -1.77606 |
| C | 1.73802  | -1.71623 | 1.49894  |
| H | 2.79484  | -1.68834 | 1.76510  |
| H | 1.37200  | -2.70843 | 1.75005  |
| C | 0.97702  | -0.64265 | 2.27013  |
| H | 0.86399  | -0.93077 | 3.31856  |
| H | 1.50961  | 0.30396  | 2.23008  |
| C | 2.77646  | -0.82819 | -0.57082 |
| H | 2.75683  | -0.98522 | -1.64942 |
| H | 3.70340  | -1.24152 | -0.17006 |
| C | 2.66606  | 0.64979  | -0.32625 |
| C | 3.76826  | 1.49351  | -0.28217 |
| H | 4.76403  | 1.07506  | -0.35426 |
| C | 3.56468  | 2.86289  | -0.15069 |



|    |          |          |          |
|----|----------|----------|----------|
| H  | 4.40857  | 3.54128  | -0.11361 |
| C  | 2.26217  | 3.34741  | -0.07220 |
| H  | 2.05535  | 4.40562  | 0.01979  |
| C  | 1.20982  | 2.44530  | -0.11010 |
| H  | 0.18499  | 2.78316  | -0.05251 |
| Fe | 0.02944  | -0.33403 | -0.38280 |
| O  | 0.37917  | -0.23529 | -2.16282 |
| H  | -0.26683 | -0.67904 | -2.72410 |

**1OH(III)q**

E = -2353.930404

G = -2353.512924

2,4

|   |          |          |          |
|---|----------|----------|----------|
| N | -1.74054 | 0.88553  | -0.36174 |
| N | -0.36404 | -0.38491 | 1.56481  |
| N | -0.86476 | -2.21928 | -0.52319 |
| N | 1.79821  | -1.43445 | 0.12759  |
| N | 1.44100  | 1.22635  | -0.27726 |
| C | -2.53091 | 1.21056  | -1.39556 |
| H | -2.17630 | 0.90634  | -2.37208 |
| C | -3.72485 | 1.89255  | -1.21321 |
| H | -4.34213 | 2.13899  | -2.06722 |
| C | -4.10240 | 2.24160  | 0.08188  |
| H | -5.03284 | 2.76823  | 0.25801  |
| C | -3.27700 | 1.90539  | 1.15247  |
| H | -3.54212 | 2.15985  | 2.17075  |
| C | -2.09395 | 1.22801  | 0.89236  |
| C | -1.07702 | 0.87105  | 1.94315  |
| H | -1.52855 | 0.77720  | 2.93219  |
| H | -0.34084 | 1.67614  | 1.98655  |
| C | -1.22523 | -1.59502 | 1.85242  |
| H | -2.00444 | -1.32697 | 2.56624  |
| H | -0.60335 | -2.34788 | 2.32985  |
| C | -1.86109 | -2.14937 | 0.58753  |
| H | -2.27635 | -3.14264 | 0.78555  |
| H | -2.67341 | -1.50886 | 0.24827  |
| C | -1.57163 | -2.51157 | -1.79566 |
| H | -2.16917 | -3.42186 | -1.69027 |
| H | -0.84461 | -2.66944 | -2.59212 |
| H | -2.22734 | -1.67986 | -2.05177 |
| C | 0.18676  | -3.26739 | -0.26662 |
| H | -0.00639 | -4.13529 | -0.89834 |
| H | 0.10395  | -3.60400 | 0.76393  |
| C | 1.58643  | -2.73546 | -0.55507 |
| H | 2.33417  | -3.47458 | -0.24976 |
| H | 1.69464  | -2.55525 | -1.62439 |
| C | 1.84292  | -1.53822 | 1.61849  |
| H | 2.86729  | -1.41199 | 1.97502  |
| H | 1.53028  | -2.53904 | 1.90800  |
| C | 0.95329  | -0.47997 | 2.27273  |
| H | 0.79562  | -0.71523 | 3.32884  |
| H | 1.42380  | 0.49805  | 2.20942  |
| C | 2.93752  | -0.67456 | -0.42620 |
| H | 2.99713  | -0.88920 | -1.49543 |
| H | 3.88180  | -0.97814 | 0.03341  |
| C | 2.72087  | 0.81198  | -0.27931 |

|    |          |          |          |
|----|----------|----------|----------|
| C  | 3.77460  | 1.71710  | -0.21453 |
| H  | 4.79356  | 1.35117  | -0.19942 |
| C  | 3.49396  | 3.07854  | -0.17673 |
| H  | 4.29943  | 3.80163  | -0.12710 |
| C  | 2.16661  | 3.49943  | -0.20540 |
| H  | 1.90403  | 4.54904  | -0.18479 |
| C  | 1.16722  | 2.53997  | -0.25500 |
| H  | 0.12080  | 2.81373  | -0.27611 |
| Fe | 0.02145  | -0.29899 | -0.47477 |
| O  | 0.31167  | -0.15259 | -2.24417 |
| H  | -0.11546 | -0.82608 | -2.78794 |

**1OH(III)sext**

E = -2353.942421

G = -2353.526917

2,6

|   |          |          |          |
|---|----------|----------|----------|
| N | -1.67532 | 0.98432  | -0.36848 |
| N | -0.41222 | -0.34647 | 1.63905  |
| N | -1.01456 | -2.24291 | -0.41468 |
| N | 1.68402  | -1.48549 | 0.09251  |
| N | 1.54076  | 1.18411  | -0.31349 |
| C | -2.43159 | 1.35374  | -1.41824 |
| H | -2.07931 | 1.02517  | -2.38717 |
| C | -3.58560 | 2.10221  | -1.25737 |
| H | -4.17350 | 2.38032  | -2.12218 |
| C | -3.96433 | 2.47354  | 0.03166  |
| H | -4.86687 | 3.05110  | 0.19252  |
| C | -3.17807 | 2.09091  | 1.11448  |
| H | -3.44682 | 2.35915  | 2.12829  |
| C | -2.02953 | 1.34617  | 0.88107  |
| C | -1.07284 | 0.93731  | 1.97284  |
| H | -1.58049 | 0.89116  | 2.93918  |
| H | -0.30318 | 1.71023  | 2.04067  |
| C | -1.28706 | -1.51960 | 1.95833  |
| H | -2.05178 | -1.22918 | 2.68124  |
| H | -0.67821 | -2.28364 | 2.43666  |
| C | -1.96917 | -2.08454 | 0.71670  |
| H | -2.43477 | -3.04608 | 0.95865  |
| H | -2.75427 | -1.41023 | 0.37460  |
| C | -1.76535 | -2.52189 | -1.66164 |
| H | -2.41414 | -3.39379 | -1.52903 |
| H | -1.06380 | -2.72315 | -2.46906 |
| H | -2.37178 | -1.65356 | -1.91935 |
| C | 0.01352  | -3.30412 | -0.16113 |
| H | -0.21951 | -4.19307 | -0.75013 |
| H | -0.03206 | -3.60082 | 0.88402  |
| C | 1.41096  | -2.81311 | -0.52907 |
| H | 2.16213  | -3.54849 | -0.22437 |
| H | 1.47681  | -2.67655 | -1.60846 |
| C | 1.76676  | -1.54921 | 1.58995  |
| H | 2.80637  | -1.44398 | 1.90523  |
| H | 1.44124  | -2.53640 | 1.90859  |
| C | 0.92987  | -0.46249 | 2.26995  |
| H | 0.84376  | -0.68583 | 3.33836  |
| H | 1.42047  | 0.50289  | 2.16856  |
| C | 2.87083  | -0.82308 | -0.50118 |

|    |          |          |          |
|----|----------|----------|----------|
| H  | 2.86290  | -1.02350 | -1.57510 |
| H  | 3.79893  | -1.22259 | -0.08532 |
| C  | 2.78633  | 0.67132  | -0.31241 |
| C  | 3.90376  | 1.48845  | -0.19829 |
| H  | 4.89246  | 1.04783  | -0.18625 |
| C  | 3.72290  | 2.86479  | -0.09983 |
| H  | 4.57965  | 3.52153  | -0.00739 |
| C  | 2.43190  | 3.38842  | -0.11778 |
| H  | 2.25149  | 4.45292  | -0.04555 |
| C  | 1.36324  | 2.51211  | -0.22608 |
| H  | 0.33795  | 2.85922  | -0.23849 |
| Fe | -0.00762 | -0.27948 | -0.58729 |
| O  | 0.19514  | -0.31997 | -2.39664 |
| H  | -0.12446 | -0.86478 | -3.12230 |

**1O(IV)t**

E = -2353.299394

G = -2352.886708

2,3

|   |          |          |          |
|---|----------|----------|----------|
| N | -1.53296 | 0.88312  | -0.35783 |
| N | -0.33844 | -0.43684 | 1.62781  |
| N | -1.07716 | -2.06518 | -0.49232 |
| N | 1.60517  | -1.50215 | -0.03821 |
| N | 1.38871  | 1.13716  | -0.24901 |
| C | -2.22283 | 1.30597  | -1.43067 |
| H | -1.86817 | 0.94645  | -2.38678 |
| C | -3.31823 | 2.14548  | -1.30708 |
| H | -3.85073 | 2.46369  | -2.19362 |
| C | -3.71148 | 2.55431  | -0.03518 |
| H | -4.57095 | 3.20108  | 0.09316  |
| C | -2.98789 | 2.12358  | 1.07221  |
| H | -3.25914 | 2.42286  | 2.07646  |
| C | -1.89230 | 1.29362  | 0.87966  |
| C | -0.97965 | 0.85300  | 1.99253  |
| H | -1.51248 | 0.78228  | 2.94226  |
| H | -0.19695 | 1.60556  | 2.10955  |
| C | -1.25059 | -1.59679 | 1.92496  |
| H | -1.95359 | -1.32285 | 2.71227  |
| H | -0.64780 | -2.41684 | 2.30735  |
| C | -2.00496 | -2.02086 | 0.67627  |
| H | -2.46967 | -2.99977 | 0.82520  |
| H | -2.79104 | -1.30772 | 0.43617  |
| C | -1.86860 | -2.19573 | -1.74277 |
| H | -2.46022 | -3.11470 | -1.70694 |
| H | -1.18937 | -2.21717 | -2.59101 |
| H | -2.53481 | -1.34185 | -1.84021 |
| C | -0.10850 | -3.22540 | -0.38302 |
| H | -0.42643 | -4.02579 | -1.05133 |
| H | -0.14987 | -3.62192 | 0.62801  |
| C | 1.30346  | -2.78840 | -0.73844 |
| H | 2.02927  | -3.55732 | -0.46172 |
| H | 1.38011  | -2.59108 | -1.80561 |
| C | 1.76879  | -1.68676 | 1.45940  |
| H | 2.82868  | -1.64804 | 1.71144  |
| H | 1.41597  | -2.68192 | 1.71672  |
| C | 1.00622  | -0.62243 | 2.24376  |
| H | 0.92244  | -0.91724 | 3.29328  |

|    |         |          |          |
|----|---------|----------|----------|
| H  | 1.52555 | 0.33150  | 2.19924  |
| C  | 2.77820 | -0.79662 | -0.62405 |
| H  | 2.74837 | -0.94541 | -1.70482 |
| H  | 3.71449 | -1.20454 | -0.24073 |
| C  | 2.65515 | 0.67607  | -0.35819 |
| C  | 3.74677 | 1.53083  | -0.29794 |
| H  | 4.74699 | 1.12376  | -0.37167 |
| C  | 3.52736 | 2.89610  | -0.14858 |
| H  | 4.36397 | 3.58256  | -0.09937 |
| C  | 2.22001 | 3.36704  | -0.06912 |
| H  | 2.00233 | 4.42171  | 0.03589  |
| C  | 1.17581 | 2.45718  | -0.12339 |
| H  | 0.14783 | 2.78418  | -0.06873 |
| Fe | 0.03435 | -0.34162 | -0.43993 |
| O  | 0.22807 | -0.32545 | -2.06270 |

**2O(III)d**

E = -2353.404711

G = -2352.996265

1,2

|    |          |          |          |
|----|----------|----------|----------|
| N  | -1.95248 | -1.43284 | -0.02927 |
| C  | -3.12166 | -0.69574 | 0.54259  |
| C  | -3.25273 | 0.66153  | -0.11269 |
| N  | -1.95850 | 1.39589  | -0.13752 |
| C  | -1.55157 | 2.02489  | 1.15791  |
| C  | -0.90114 | 1.06411  | 2.17943  |
| N  | -0.21406 | -0.10550 | 1.54420  |
| C  | -1.33638 | -2.29103 | 1.01557  |
| C  | -0.67005 | -1.42452 | 2.10001  |
| C  | 1.27597  | -0.01231 | 1.46964  |
| C  | 1.74017  | -1.16890 | 0.58965  |
| C  | 1.63722  | 1.23388  | 0.68363  |
| N  | 0.92545  | 1.33909  | -0.45918 |
| C  | 1.24785  | 2.28197  | -1.35194 |
| C  | 2.26306  | 3.19947  | -1.10770 |
| C  | 2.96303  | 3.12945  | 0.09471  |
| C  | 2.65420  | 2.11866  | 1.00464  |
| N  | 0.99015  | -1.29536 | -0.52620 |
| C  | 1.33132  | -2.19040 | -1.45915 |
| C  | 2.42769  | -3.02908 | -1.29323 |
| C  | 3.18597  | -2.92695 | -0.12858 |
| C  | 2.84289  | -1.97252 | 0.82996  |
| Fe | -0.52583 | -0.01701 | -0.53205 |
| C  | -2.36107 | -2.24374 | -1.19381 |
| C  | -2.07740 | 2.44523  | -1.17773 |
| H  | -2.98407 | -0.58810 | 1.61535  |
| H  | -4.03920 | -1.27353 | 0.39740  |
| H  | -4.02748 | 1.25678  | 0.38408  |
| H  | -3.53944 | 0.52680  | -1.15516 |
| H  | -2.40780 | 2.52191  | 1.62735  |
| H  | -0.82918 | 2.79455  | 0.89610  |
| H  | -1.65734 | 0.67926  | 2.85793  |
| H  | -0.19356 | 1.63307  | 2.78793  |
| H  | -0.60122 | -2.92236 | 0.52251  |
| H  | -2.08907 | -2.94513 | 1.47072  |
| H  | 0.17267  | -1.96717 | 2.53013  |

|   |          |          |          |
|---|----------|----------|----------|
| H | -1.36395 | -1.23380 | 2.91508  |
| H | 1.75664  | -0.02854 | 2.45030  |
| H | 0.66809  | 2.26836  | -2.26460 |
| H | 2.49613  | 3.95177  | -1.85031 |
| H | 3.74983  | 3.84076  | 0.31561  |
| H | 3.19330  | 2.00757  | 1.93672  |
| H | 0.69822  | -2.19260 | -2.33709 |
| H | 2.67850  | -3.74653 | -2.06430 |
| H | 4.03868  | -3.57619 | 0.03075  |
| H | 3.41555  | -1.84996 | 1.74048  |
| H | -2.69659 | -1.57119 | -1.97990 |
| H | -1.49416 | -2.78551 | -1.56733 |
| H | -3.14786 | -2.95604 | -0.91836 |
| H | -2.10686 | 1.93638  | -2.14005 |
| H | -2.97391 | 3.05489  | -1.01675 |
| H | -1.20558 | 3.09390  | -1.15002 |
| O | -0.76961 | -0.00251 | -2.25037 |

|   |          |          |          |
|---|----------|----------|----------|
| H | 2.66716  | 2.31939  | 1.83050  |
| H | 0.18089  | 1.82732  | 2.53784  |
| H | 1.42371  | 0.69405  | 2.99709  |
| H | -1.72320 | 0.43805  | 2.35092  |
| H | -1.52054 | -2.36551 | -2.21431 |
| H | -3.71509 | -3.39875 | -1.61289 |
| H | -4.80058 | -2.73245 | 0.54629  |
| H | -3.66544 | -1.02277 | 1.98461  |
| H | -0.05819 | 2.48876  | -2.30662 |
| H | -1.65193 | 4.41561  | -2.00161 |
| H | -3.12314 | 4.43204  | 0.02692  |
| H | -2.96474 | 2.52608  | 1.64608  |
| H | 3.44366  | 0.99884  | -1.63723 |
| H | 2.45141  | 2.41083  | -1.30478 |
| H | 4.01932  | 2.22463  | -0.46627 |
| H | 1.95931  | -2.30831 | -2.22316 |
| H | 2.21042  | -3.67898 | -1.08944 |
| H | 0.57210  | -3.09784 | -1.47552 |
| O | 0.94555  | -0.00668 | -2.29053 |

### 2O(III)q

E = -2353.434321

G = -2353.031779

1,4

|    |          |          |          |
|----|----------|----------|----------|
| N  | 2.43723  | 0.95490  | 0.19802  |
| C  | 3.26686  | -0.12711 | 0.77041  |
| C  | 3.08675  | -1.42531 | -0.01027 |
| N  | 1.66244  | -1.80839 | -0.21373 |
| C  | 0.98570  | -2.38375 | 0.98727  |
| C  | 0.50764  | -1.34963 | 2.02627  |
| N  | 0.17577  | -0.00820 | 1.43699  |
| C  | 1.88211  | 1.85435  | 1.21735  |
| C  | 0.90089  | 1.11166  | 2.13967  |
| C  | -1.28849 | 0.29157  | 1.35934  |
| C  | -1.43764 | 1.54398  | 0.50627  |
| C  | -2.01497 | -0.82183 | 0.62294  |
| N  | -1.42099 | -1.20118 | -0.51924 |
| C  | -2.03209 | -2.10100 | -1.29613 |
| C  | -3.25343 | -2.67376 | -0.95437 |
| C  | -3.85502 | -2.29782 | 0.24406  |
| C  | -3.22743 | -1.34995 | 1.04995  |
| N  | -0.63638 | 1.55250  | -0.57979 |
| C  | -0.72411 | 2.56142  | -1.45625 |
| C  | -1.61036 | 3.61493  | -1.27402 |
| C  | -2.42828 | 3.61895  | -0.14584 |
| C  | -2.34364 | 2.56303  | 0.76006  |
| Fe | 0.60590  | -0.06603 | -0.68893 |
| C  | 3.13920  | 1.69371  | -0.85642 |
| C  | 1.60416  | -2.79374 | -1.31704 |
| H  | 2.99885  | -0.27540 | 1.81364  |
| H  | 4.32892  | 0.14589  | 0.75916  |
| H  | 3.63131  | -2.23789 | 0.48513  |
| H  | 3.50674  | -1.29571 | -1.00760 |
| H  | 1.64392  | -3.10851 | 1.48028  |
| H  | 0.12238  | -2.92552 | 0.60956  |
| H  | 1.27357  | -1.20291 | 2.78224  |
| H  | -0.36395 | -1.75764 | 2.54280  |
| H  | 1.36173  | 2.65148  | 0.68738  |

### 2O(III)sext

E = -2353.435101

G = -2353.0342

1,6

|    |          |          |          |
|----|----------|----------|----------|
| N  | -2.07290 | -1.52287 | 0.10664  |
| C  | -3.14226 | -0.73155 | 0.77282  |
| C  | -3.32366 | 0.63199  | 0.11647  |
| N  | -2.06024 | 1.39795  | -0.03941 |
| C  | -1.51920 | 2.00053  | 1.20525  |
| C  | -0.82233 | 1.01845  | 2.17363  |
| N  | -0.14456 | -0.13157 | 1.51656  |
| C  | -1.30496 | -2.33358 | 1.07421  |
| C  | -0.54163 | -1.45093 | 2.08595  |
| C  | 1.32065  | 0.01629  | 1.38217  |
| C  | 1.85469  | -1.13581 | 0.53507  |
| C  | 1.64847  | 1.29000  | 0.61421  |
| N  | 0.97441  | 1.43361  | -0.53998 |
| C  | 1.26211  | 2.45997  | -1.34647 |
| C  | 2.22183  | 3.41171  | -1.01776 |
| C  | 2.90056  | 3.28225  | 0.19057  |
| C  | 2.61568  | 2.19843  | 1.02043  |
| N  | 1.13824  | -1.39678 | -0.57254 |
| C  | 1.55961  | -2.33851 | -1.42366 |
| C  | 2.71582  | -3.07577 | -1.19498 |
| C  | 3.45388  | -2.81605 | -0.04331 |
| C  | 3.01940  | -1.82736 | 0.83782  |
| Fe | -0.63249 | -0.08277 | -0.84387 |
| C  | -2.62224 | -2.36400 | -0.97179 |
| C  | -2.28398 | 2.45723  | -1.04875 |
| H  | -2.90146 | -0.61766 | 1.82563  |
| H  | -4.09361 | -1.27242 | 0.73037  |
| H  | -4.06004 | 1.21774  | 0.68128  |
| H  | -3.71435 | 0.48463  | -0.89093 |
| H  | -2.31364 | 2.52244  | 1.75379  |
| H  | -0.79965 | 2.75137  | 0.88492  |
| H  | -1.55510 | 0.62143  | 2.87036  |

|   |          |          |          |
|---|----------|----------|----------|
| H | -0.10925 | 1.59278  | 2.77381  |
| H | -0.60487 | -2.93439 | 0.49547  |
| H | -1.96392 | -3.02151 | 1.61998  |
| H | 0.33688  | -2.00084 | 2.42837  |
| H | -1.15399 | -1.28135 | 2.97044  |
| H | 1.82796  | 0.02895  | 2.35208  |
| H | 0.69730  | 2.50558  | -2.26923 |
| H | 2.42536  | 4.23185  | -1.69428 |
| H | 3.64716  | 4.01112  | 0.48303  |
| H | 3.13206  | 2.05616  | 1.96129  |
| H | 0.94256  | -2.49057 | -2.30076 |
| H | 3.02546  | -3.83262 | -1.90422 |
| H | 4.35800  | -3.37501 | 0.16780  |
| H | 3.56919  | -1.59489 | 1.74123  |
| H | -3.13111 | -1.72690 | -1.69279 |
| H | -1.80181 | -2.86375 | -1.48674 |
| H | -3.31931 | -3.11642 | -0.58004 |
| H | -2.49635 | 1.97949  | -2.00339 |
| H | -3.10790 | 3.12066  | -0.75677 |
| H | -1.37716 | 3.04890  | -1.15802 |
| O | -0.99162 | -0.06435 | -2.51652 |

**2OH(III)d**

E = -2353.93096

G = -2353.507789

2,2

|    |          |          |          |
|----|----------|----------|----------|
| N  | 1.96017  | 1.41448  | -0.02698 |
| C  | 3.12972  | 0.69642  | 0.58195  |
| C  | 3.27085  | -0.66423 | -0.05472 |
| N  | 1.95607  | -1.37807 | -0.11311 |
| C  | 1.52714  | -2.01807 | 1.18214  |
| C  | 0.88824  | -1.04975 | 2.18905  |
| N  | 0.20159  | 0.11327  | 1.51696  |
| C  | 1.32630  | 2.29731  | 0.99745  |
| C  | 0.64887  | 1.44638  | 2.07911  |
| C  | -1.29731 | 0.00735  | 1.47749  |
| C  | -1.76873 | 1.16027  | 0.60499  |
| C  | -1.65440 | -1.23728 | 0.69098  |
| N  | -0.93414 | -1.33809 | -0.44629 |
| C  | -1.24261 | -2.27122 | -1.35263 |
| C  | -2.26581 | -3.18441 | -1.12570 |
| C  | -2.97639 | -3.12050 | 0.06940  |
| C  | -2.67557 | -2.11985 | 0.99405  |
| N  | -1.00594 | 1.29626  | -0.50002 |
| C  | -1.33410 | 2.19292  | -1.43569 |
| C  | -2.44259 | 3.01749  | -1.28262 |
| C  | -3.21735 | 2.90250  | -0.13169 |
| C  | -2.88038 | 1.95134  | 0.83190  |
| Fe | 0.53764  | 0.01830  | -0.48501 |
| C  | 2.40338  | 2.23251  | -1.18271 |
| C  | 2.10115  | -2.46495 | -1.12052 |
| H  | 2.97595  | 0.60969  | 1.65311  |
| H  | 4.03981  | 1.28177  | 0.43577  |
| H  | 4.00810  | -1.27295 | 0.47543  |
| H  | 3.60054  | -0.55112 | -1.08739 |

|   |          |          |          |
|---|----------|----------|----------|
| H | 2.38306  | -2.51769 | 1.64348  |
| H | 0.80327  | -2.78201 | 0.91052  |
| H | 1.64027  | -0.65115 | 2.86176  |
| H | 0.16907  | -1.59648 | 2.80100  |
| H | 0.60552  | 2.92708  | 0.48321  |
| H | 2.08310  | 2.94688  | 1.44690  |
| H | -0.20535 | 1.98302  | 2.48931  |
| H | 1.32795  | 1.25510  | 2.90474  |
| H | -1.74306 | 0.01971  | 2.47165  |
| H | -0.65556 | -2.25794 | -2.26054 |
| H | -2.49408 | -3.92868 | -1.87714 |
| H | -3.76851 | -3.83012 | 0.27512  |
| H | -3.22417 | -2.01472 | 1.92075  |
| H | -0.69152 | 2.22112  | -2.30518 |
| H | -2.68738 | 3.73375  | -2.05586 |
| H | -4.08070 | 3.54033  | 0.01403  |
| H | -3.46384 | 1.82044  | 1.73379  |
| H | 2.94764  | 1.60494  | -1.88610 |
| H | 1.53477  | 2.65682  | -1.68032 |
| H | 3.06062  | 3.03632  | -0.83871 |
| H | 2.32171  | -2.03306 | -2.09337 |
| H | 2.91631  | -3.13134 | -0.82348 |
| H | 1.18313  | -3.04019 | -1.18490 |
| O | 0.67100  | 0.01164  | -2.28654 |
| H | 1.58001  | 0.00128  | -2.61239 |

**2OH(III)q**

E = -2353.913505

G = -2353.497337

2,4

|    |          |          |          |
|----|----------|----------|----------|
| N  | -2.36467 | -1.00435 | 0.17899  |
| C  | -3.24084 | 0.04978  | 0.75688  |
| C  | -3.09228 | 1.35102  | -0.01744 |
| N  | -1.66357 | 1.77348  | -0.20388 |
| C  | -1.02112 | 2.35954  | 1.02808  |
| C  | -0.54040 | 1.32764  | 2.06049  |
| N  | -0.16904 | -0.00441 | 1.44810  |
| C  | -1.81852 | -1.91134 | 1.21076  |
| C  | -0.86915 | -1.15609 | 2.14874  |
| C  | 1.31229  | -0.27207 | 1.38783  |
| C  | 1.48211  | -1.51500 | 0.52503  |
| C  | 1.99703  | 0.85970  | 0.64624  |
| N  | 1.35341  | 1.21959  | -0.47667 |
| C  | 1.91507  | 2.11620  | -1.29475 |
| C  | 3.13691  | 2.71215  | -1.00063 |
| C  | 3.78668  | 2.36358  | 0.17979  |
| C  | 3.21120  | 1.41211  | 1.02152  |
| N  | 0.68052  | -1.51691 | -0.56308 |
| C  | 0.75917  | -2.50301 | -1.46363 |
| C  | 1.65386  | -3.55299 | -1.29982 |
| C  | 2.47683  | -3.56571 | -0.17699 |
| C  | 2.39565  | -2.52835 | 0.75315  |
| Fe | -0.58661 | 0.06482  | -0.56935 |
| C  | -3.04752 | -1.76598 | -0.88518 |
| C  | -1.63352 | 2.81331  | -1.26787 |
| H  | -2.98877 | 0.19551  | 1.80337  |
| H  | -4.28747 | -0.26634 | 0.72512  |

|   |          |          |          |
|---|----------|----------|----------|
| H | -3.64373 | 2.15417  | 0.47890  |
| H | -3.50543 | 1.22125  | -1.01762 |
| H | -1.72289 | 3.05083  | 1.50272  |
| H | -0.17103 | 2.93611  | 0.67351  |
| H | -1.31419 | 1.14691  | 2.79875  |
| H | 0.31767  | 1.73758  | 2.59477  |
| H | -1.28498 | -2.70452 | 0.68917  |
| H | -2.62207 | -2.37331 | 1.79502  |
| H | -0.12672 | -1.84825 | 2.54300  |
| H | -1.40381 | -0.75054 | 3.00289  |
| H | 1.73228  | -0.40691 | 2.38476  |
| H | 1.36949  | 2.35457  | -2.19916 |
| H | 3.56249  | 3.43403  | -1.68556 |
| H | 4.73402  | 2.81991  | 0.44058  |
| H | 3.69127  | 1.09972  | 1.93987  |
| H | 0.08729  | -2.42032 | -2.30832 |
| H | 1.69893  | -4.34139 | -2.03970 |
| H | 3.17898  | -4.37624 | -0.02357 |
| H | 3.02318  | -2.50546 | 1.63438  |
| H | -3.44673 | -1.07675 | -1.62756 |
| H | -2.32453 | -2.41954 | -1.37197 |
| H | -3.86578 | -2.36353 | -0.46779 |
| H | -2.07263 | 2.42067  | -2.18229 |
| H | -2.20564 | 3.68916  | -0.94742 |
| H | -0.60660 | 3.10809  | -1.46468 |
| O | -0.87450 | -0.06519 | -2.34233 |
| H | -1.59208 | 0.48197  | -2.68674 |

**2OH(III)sext**

E = -2353.926876

G = -2353.514338

2,6

|    |          |          |          |
|----|----------|----------|----------|
| N  | -2.06995 | -1.45676 | 0.12419  |
| C  | -3.13982 | -0.65187 | 0.78935  |
| C  | -3.29963 | 0.70240  | 0.11969  |
| N  | -2.00874 | 1.43680  | -0.04721 |
| C  | -1.46145 | 2.05378  | 1.19818  |
| C  | -0.79070 | 1.06678  | 2.17200  |
| N  | -0.13942 | -0.10751 | 1.50438  |
| C  | -1.33355 | -2.29225 | 1.10606  |
| C  | -0.55679 | -1.41843 | 2.10728  |
| C  | 1.34243  | 0.00459  | 1.39591  |
| C  | 1.83390  | -1.16529 | 0.55309  |
| C  | 1.69238  | 1.26101  | 0.61809  |
| N  | 0.98441  | 1.41614  | -0.51810 |
| C  | 1.27978  | 2.42390  | -1.35022 |
| C  | 2.28316  | 3.34047  | -1.06043 |
| C  | 2.99405  | 3.20177  | 0.12769  |
| C  | 2.69970  | 2.13903  | 0.98129  |
| N  | 1.08648  | -1.39328 | -0.54349 |
| C  | 1.44602  | -2.34669 | -1.41283 |
| C  | 2.57524  | -3.12860 | -1.20615 |
| C  | 3.34397  | -2.90593 | -0.06686 |
| C  | 2.97092  | -1.90530 | 0.83013  |
| Fe | -0.59733 | -0.05894 | -0.72414 |
| C  | -2.63408 | -2.29901 | -0.95574 |
| C  | -2.22167 | 2.50020  | -1.06421 |

|   |          |          |          |
|---|----------|----------|----------|
| H | -2.89960 | -0.53854 | 1.84158  |
| H | -4.08918 | -1.19128 | 0.74081  |
| H | -4.00907 | 1.31831  | 0.68136  |
| H | -3.69770 | 0.55786  | -0.88505 |
| H | -2.25829 | 2.58579  | 1.72755  |
| H | -0.73308 | 2.79221  | 0.87185  |
| H | -1.52863 | 0.68479  | 2.86973  |
| H | -0.05563 | 1.61678  | 2.76432  |
| H | -0.65411 | -2.92538 | 0.53900  |
| H | -2.03066 | -2.94241 | 1.64513  |
| H | 0.31666  | -1.97127 | 2.45237  |
| H | -1.16101 | -1.21786 | 2.98875  |
| H | 1.82511  | 0.00801  | 2.37492  |
| H | 0.69060  | 2.48709  | -2.25594 |
| H | 2.49359  | 4.14420  | -1.75364 |
| H | 3.77417  | 3.90740  | 0.38662  |
| H | 3.23975  | 1.98807  | 1.90691  |
| H | 0.80566  | -2.46614 | -2.27748 |
| H | 2.84053  | -3.89306 | -1.92452 |
| H | 4.22758  | -3.50329 | 0.12333  |
| H | 3.54642  | -1.70085 | 1.72374  |
| H | -3.19338 | -1.66958 | -1.64600 |
| H | -1.82119 | -2.78432 | -1.49461 |
| H | -3.30112 | -3.06099 | -0.53958 |
| H | -2.47846 | 2.03355  | -2.01315 |
| H | -3.02471 | 3.17414  | -0.74874 |
| H | -1.30695 | 3.07387  | -1.19020 |
| O | -0.94126 | -0.14578 | -2.49043 |
| H | -1.56929 | -0.55935 | -3.09016 |

**2O(IV)t**

E = -2353.283663

G = -2352.871322

2,3

|   |          |          |          |
|---|----------|----------|----------|
| N | -1.93558 | -1.43623 | -0.05047 |
| C | -3.11485 | -0.71620 | 0.54331  |
| C | -3.25802 | 0.64235  | -0.09599 |
| N | -1.94998 | 1.37343  | -0.13050 |
| C | -1.54110 | 2.01232  | 1.17120  |
| C | -0.90735 | 1.04562  | 2.18297  |
| N | -0.21737 | -0.11407 | 1.51673  |
| C | -1.30901 | -2.30933 | 0.98608  |
| C | -0.65408 | -1.44844 | 2.07470  |
| C | 1.27656  | 0.00057  | 1.46632  |
| C | 1.75664  | -1.15067 | 0.59589  |
| C | 1.62621  | 1.24748  | 0.68098  |
| N | 0.91029  | 1.35132  | -0.45960 |
| C | 1.21830  | 2.29047  | -1.36074 |
| C | 2.23418  | 3.20843  | -1.12388 |
| C | 2.93989  | 3.14220  | 0.07345  |
| C | 2.64059  | 2.13490  | 0.99094  |
| N | 1.00226  | -1.30134 | -0.51372 |
| C | 1.34618  | -2.19925 | -1.44356 |
| C | 2.46037  | -3.01260 | -1.27850 |
| C | 3.22591  | -2.88433 | -0.12327 |

|    |          |          |          |
|----|----------|----------|----------|
| C  | 2.87307  | -1.93164 | 0.83260  |
| Fe | -0.54511 | -0.01974 | -0.54563 |
| C  | -2.36553 | -2.25527 | -1.21171 |
| C  | -2.09274 | 2.45439  | -1.14610 |
| H  | -2.97476 | -0.62789 | 1.61608  |
| H  | -4.01925 | -1.30662 | 0.38520  |
| H  | -4.00620 | 1.24423  | 0.42575  |
| H  | -3.56871 | 0.52860  | -1.13363 |
| H  | -2.40840 | 2.50316  | 1.61987  |
| H  | -0.82145 | 2.78320  | 0.90922  |
| H  | -1.66407 | 0.64632  | 2.85024  |
| H  | -0.19550 | 1.59587  | 2.80074  |
| H  | -0.57785 | -2.93770 | 0.48578  |
| H  | -2.07036 | -2.96039 | 1.42497  |
| H  | 0.19911  | -1.97696 | 2.49810  |
| H  | -1.34631 | -1.26463 | 2.89109  |
| H  | 1.72992  | -0.00839 | 2.45726  |
| H  | 0.63586  | 2.28735  | -2.27126 |
| H  | 2.45927  | 3.95834  | -1.87049 |
| H  | 3.72696  | 3.85509  | 0.28662  |
| H  | 3.18533  | 2.02757  | 1.91957  |
| H  | 0.70996  | -2.24809 | -2.31660 |
| H  | 2.71550  | -3.73059 | -2.04661 |
| H  | 4.09428  | -3.51297 | 0.03183  |
| H  | 3.44870  | -1.79062 | 1.73792  |
| H  | -2.82599 | -1.60768 | -1.95407 |
| H  | -1.49660 | -2.73627 | -1.65399 |
| H  | -3.07811 | -3.01635 | -0.88215 |
| H  | -2.24076 | 2.00075  | -2.12294 |
| H  | -2.94954 | 3.08267  | -0.88723 |
| H  | -1.20019 | 3.07158  | -1.16419 |
| O  | -0.76083 | -0.01053 | -2.15949 |

**PhSMe**

E = -669.9041  
G = -669.808869  
0,1

|   |          |          |          |
|---|----------|----------|----------|
| C | 1.93666  | -1.20708 | 0.10829  |
| C | 0.56737  | -1.20998 | -0.15496 |
| C | -0.12318 | 0.00000  | -0.28398 |
| C | 0.56737  | 1.20998  | -0.15496 |
| C | 1.93666  | 1.20708  | 0.10829  |
| C | 2.62289  | 0.00000  | 0.23992  |
| H | 2.46572  | -2.14839 | 0.20795  |
| H | 0.03506  | -2.14837 | -0.25909 |
| H | 0.03506  | 2.14837  | -0.25909 |
| H | 2.46572  | 2.14839  | 0.20795  |
| H | 3.68796  | 0.00000  | 0.44303  |
| S | -1.89082 | 0.00000  | -0.63609 |
| C | -2.55943 | 0.00000  | 1.07523  |
| H | -2.23923 | 0.89468  | 1.61029  |
| H | -3.64790 | 0.00000  | 0.98927  |
| H | -2.23923 | -0.89468 | 1.61029  |

**PhSMe+**

E = -669.700293  
G = -669.604701

|   |          |          |          |
|---|----------|----------|----------|
|   | 1,2      |          |          |
| C | 1.66746  | -1.40142 | -0.00011 |
| C | 0.31690  | -1.13406 | -0.00008 |
| C | -0.11597 | 0.21847  | -0.00002 |
| C | 0.83537  | 1.28345  | 0.00013  |
| C | 2.18045  | 0.98885  | 0.00020  |
| C | 2.60291  | -0.34932 | -0.00005 |
| H | 2.01199  | -2.42780 | -0.00007 |
| H | -0.39537 | -1.94715 | -0.00007 |
| H | 0.49788  | 2.31365  | 0.00045  |
| H | 2.90951  | 1.78915  | 0.00048  |
| H | 3.66201  | -0.57746 | -0.00026 |
| S | -1.76332 | 0.70856  | -0.00029 |
| C | -2.75249 | -0.81066 | 0.00036  |
| H | -2.54552 | -1.39064 | 0.90065  |
| H | -3.78983 | -0.47674 | 0.00001  |
| H | -2.54541 | -1.39188 | -0.89910 |

**CHD<sup>0</sup>**

E = -233.521741  
G = -233.428861  
0,1

|   |          |          |          |
|---|----------|----------|----------|
| C | -1.49446 | -0.00001 | 0.00004  |
| C | -0.66497 | 1.25201  | -0.00002 |
| C | 0.66497  | 1.25201  | -0.00002 |
| C | 1.49446  | 0.00000  | 0.00004  |
| C | 0.66497  | -1.25200 | -0.00003 |
| C | -0.66497 | -1.25201 | -0.00002 |
| H | -2.16890 | -0.00000 | 0.86598  |
| H | -1.20364 | 2.19340  | -0.00006 |
| H | 1.20363  | 2.19341  | -0.00007 |
| H | 2.16904  | 0.00001  | -0.86580 |
| H | 1.20363  | -2.19341 | -0.00007 |
| H | -1.20362 | -2.19341 | -0.00006 |
| H | 2.16889  | 0.00000  | 0.86600  |
| H | -2.16902 | -0.00000 | -0.86582 |

**CHD<sup>+</sup>**

E = -233.302381  
G = -233.213980  
1,2

|   |          |          |          |
|---|----------|----------|----------|
| C | -1.44363 | 0.00001  | 0.00001  |
| C | -0.67956 | 1.25348  | -0.00001 |
| C | 0.67957  | 1.25347  | -0.00002 |
| C | 1.44363  | -0.00001 | 0.00001  |
| C | 0.67957  | -1.25347 | -0.00002 |
| C | -0.67958 | -1.25347 | -0.00001 |
| H | -2.16684 | 0.00001  | 0.84026  |
| H | -1.23214 | 2.18294  | -0.00002 |
| H | 1.23216  | 2.18293  | -0.00004 |
| H | 2.16696  | -0.00001 | -0.84013 |
| H | 1.23213  | -2.18294 | -0.00003 |
| H | -1.23215 | -2.18293 | -0.00003 |
| H | 2.16679  | -0.00002 | 0.84031  |
| H | -2.16691 | -0.00000 | -0.84017 |



## 1. References

1. B. Ravel and M. Newville, *J. Synchrotron Radiat.*, 2005, **12**, 537-541.
2. M. Newville, *J. Synchrotron Radiat.*, 2001, **8**, 96-100.
3. J. J. Rehr and R. C. Albers, *Rev. Mod. Phys.*, 2000, **72**, 621-654.
4. V. Martin-Diaconescu, M. Bellucci, F. Musiani, S. Ciurli and M. J. Maroney, *J. Biol. Inorg. Chem.*, 2012, **17**, 353-361.
5. B. Zambelli, A. Berardi, V. Martin-Diaconescu, L. Mazzei, F. Musiani, M. J. Maroney and S. Ciurli, *J. Biol. Inorg. Chem.*, 2014, **19**, 319-334.
6. G. Sabenya, L. Lázaro, I. Gamba, V. Martin-Diaconescu, E. Andris, T. Weyhermüller, F. Neese, J. Roithova, E. Bill, J. Lloret-Fillol and M. Costas, *J. Am. Chem. Soc.*, 2017, **139**, 9168-9177.
7. A. Company, G. Sabenya, M. Gonzalez-Bejar, L. Gomez, M. Clemancey, G. Blondin, A. J. Jasniewski, M. Puri, W. R. Browne, J. M. Latour, L. Que, Jr., M. Costas, J. Perez-Prieto and J. Lloret-Fillol, *J Am Chem Soc*, 2014, **136**, 4624-4633.
8. E. J. Klinker, T. A. Jackson, M. P. Jensen, A. Stubna, G. Juhasz, E. L. Bominaar, E. Munck and L. Que, *Angew. Chem. Int. Ed.*, 2006, **45**, 7394-7397.
9. E. J. Klinker, PhD, University of Minnesota, 2005.
10. G. Sabeña Vila, PhD, Universitat de Girona, 2017.
11. N. Aliaga-Alcalde, S. DeBeer George, B. Mienert, E. Bill, K. Wieghardt and F. Neese, *Angew. Chem. Int. Ed.*, 2005, **44**, 2908-2912.
12. M. J. Frisch, G. W. Trucks, H. B. Schlegel, G. E. Scuseria, M. A. Robb, J. R. Cheeseman, G. Scalmani, V. Barone, B. Mennucci, G. A. Petersson, H. Nakatsuji, M. Caricato, X. Li, H. P. Hratchian, A. F. Izmaylov, J. Bloino, G. Zheng, J. L. Sonnenberg, M. Hada, M. Ehara, K. Toyota, R. Fukuda, J. Hasegawa, M. Ishida, T. Nakajima, Y. Honda, O. Kitao, H. Nakai, T. Vreven, J. J. A. Montgomery, J. E. Peralta, F. Ogliaro, M. Bearpark, J. J. Heyd, E. Brothers, K. N. Kudin, V. N. Staroverov, R. Kobayashi, J. Normand, K. Raghavachari, A. Rendell, J. C. Burant, S. S. Iyengar, J. Tomasi, M. Cossi, N. Rega, J. M. Millam, M. Klene, J. E. Knox, J. B. Cross, V. Bakken, C. Adamo, J. Jaramillo, R. Gomperts, R. E. Stratmann, O. Yazyev, A. J. Austin, R. Cammi, C. Pomelli, J. W. Ochterski, R. L. Martin, K. Morokuma, V. G. Zakrzewski, G. A. Voth, P. Salvador, J. J. Dannenberg, S. Dapprich, A. D. Daniels, Ö. Farkas, J. B. Foresman, J. V. Ortiz, J. Cioslowski and D. J. Fox, *Gaussian 09, Revision A.1*.
13. A. V. Marenich, C. J. Cramer and D. G. Truhlar, *J. Phys. Chem. B*, 2009, **113**, 6378-6396.
14. S. Grimme, S. Ehrlich and L. Goerigk, *J. Comput. Chem.*, 2011, **32**, 1456-1465.
15. Y.-R. Luo, *Comprehensive Handbook of Chemical Bond Energies*, CRC Press, 2007.
16. F. Neese, *Wiley Interdisciplinary Reviews: Computational Molecular Science*, 2012, **2**, 73-78.
17. A. Schäfer, H. Horn and R. Ahlrichs, *J. Chem. Phys.*, 1992, **97**, 2571-2577.
18. F. Weigend and R. Ahlrichs, *Phys. Chem. Chem. Phys.*, 2005, **7**, 3297-3305.
19. S. Grimme, J. Antony, S. Ehrlich and H. Krieg, *J. Chem. Phys.*, 2010, **132**, -.
20. A. Klamt and G. Schuurmann, *J. Chem. Soc., Perkin Trans. 2*, 1993, 799-805.
21. F. Neese, *Inorganica Chimica Acta*, 2002, **337**, 181-192.
22. M. Römel, S. Ye and F. Neese, *Inorg. Chem.*, 2009, **48**, 784-785.
